# Supplementary material
Source: PubMed Central journal article supplement (PMC2542945)
Supplement: NIHMS65277-supplement.pdf [file NIHMS65277-supplement.pdf]

# Oxygen-Centered Tetradecaimido Hexatantalum Cluster Complexes

Jamin L. Krinsky, Laura L. Anderson,<sup>†</sup> John Arnold,\* and Robert G. Bergman\*

*Department of Chemistry, University of California, Berkeley, California, 94720*

<sup>†</sup>*Department of Chemistry, University of California, Irvine, California, 92697*

## Supporting Information

### Table of Contents

|                                                                                                               |     |
|---------------------------------------------------------------------------------------------------------------|-----|
| I. Additional specific experimental procedures -----                                                          | S-1 |
| II. Electrospray Mass Spectra for 3 and 4, Including <sup>17</sup> O-, <sup>18</sup> O-Enriched Samples ----- | S-4 |
| III. Positional coordinates of computed structures -----                                                      | S-7 |

### I. Additional specific experimental procedures.

**(PhN)<sub>14</sub>Ta<sub>6</sub>O (2), from compound 1.** Compound **1** (100 mg, 0.190 mmol, 1 equiv) was dissolved in 1 mL of benzene. Aniline (89 mg, 0.95 mmol, 5 equiv) was treated with 0.6 μL (0.03 mmol, 0.16 equiv) of degassed water via microsyringe and the resulting mixture was dissolved in 0.5 mL benzene. The two solutions were mixed, and the reaction mixture was transferred to a Kontes reaction vessel. Hexane (4 mL) was then added, causing the formation of a yellow precipitate. The vessel was sealed with a Teflon valve and immersed in a 135 °C oil bath. After a few minutes, most of the yellow solid had dissolved and the solution had developed a red color. After heating for ca. 24 h the reaction vessel was allowed to cool and was transferred to a glove box. The supernatant was removed by pipette and the crystalline product was washed with Et<sub>2</sub>O (2 × 2 mL) then pentane (2 × 2 mL). Material collected from the reaction mixture was analytically pure (43 mg, 0.018 mmol, 57%).

**(*p*-MeC<sub>6</sub>H<sub>4</sub>N)<sub>14</sub>Ta<sub>6</sub>O (3), from compound 1.** Compound **1** (100 mg, 0.190 mmol, 1 equiv) was dissolved in 1 mL of benzene. *p*-Toluidine (102 mg, 0.950 mmol, 5 equiv) was treated with 0.6 μL (0.03 mmol, 0.16 equiv) of degassed water via microsyringe and the resulting mixture was dissolved in 0.5 mL benzene. The two solutions were mixed, and the reaction mixture was transferred to a Kontes reaction vessel. Hexane (4 mL) was then added, causing the formation of a yellow precipitate. The

vessel was sealed with a Teflon valve and immersed in a 135 °C oil bath. After a few minutes, most of the yellow solid had dissolved and the solution had developed a red color. After heating for ca. 24 h the reaction vessel was allowed to cool and was transferred to a glove box. The supernatant was removed by pipette and the crystalline product was washed with Et<sub>2</sub>O (2 × 2 mL) then pentane (2 × 2 mL). Isotopically-enriched samples were prepared in an identical fashion using <sup>17</sup>O/<sup>18</sup>O enriched water. Material collected from the reaction mixture was analytically pure (39.2 mg, 0.015 mmol, 48%).

**Reaction conditions from which crystals of 7 were obtained.** Compound **1** (10.0 mg, 0.019 mmol, 1 equiv) was dissolved in 0.6 mL of C<sub>6</sub>D<sub>6</sub>, and the solution was added to 13.5 mg (0.106 mmol, 5.56 equiv) of *m*-chloroaniline. The reaction mixture was then transferred to an NMR tube that contained trace tantalum oxide from previous experiments. The NMR tube was flame sealed under reduced pressure and heated at 135 °C in an oil bath for 24 h. The reaction mixture was then allowed to stand at ambient temperature for ca. three weeks during which time red/orange crystals of **7** formed.

**Ta(OSiPh<sub>3</sub>)<sub>5</sub> (12).** Compound **3** (50 mg, 0.019 mmol, 1.0 equiv) was dissolved in 5 mL of benzene and 156 mg (0.564 mmol, 29.0 equiv) of triphenylsilanol were added. The reaction mixture became yellow-orange in color after being stirred for about 1 h. After 2 d, the light yellow solution was cooled to freezing and the solvent was removed under reduced pressure. The resulting amorphous residue was washed with Et<sub>2</sub>O (3 × 1 mL), leaving a white powder which was then dissolved with heating in 1 mL of benzene. Pentane vapor (1 mL total) was allowed to diffuse into the benzene solution over 3 d. The supernatant was then decanted and the crystalline **12**·C<sub>6</sub>H<sub>6</sub> (103 mg, 0.0629 mmol, 54%) was washed with Et<sub>2</sub>O (2 × 1 mL). Some of the crystals were suitable for analysis by X-ray diffraction. <sup>1</sup>H NMR (500 MHz, CD<sub>2</sub>Cl<sub>2</sub>): δ 7.16 (m, 45H), 6.82 (d, *J* = 7.5 Hz, 30H). <sup>13</sup>C {<sup>1</sup>H} NMR (125.8 MHz, CD<sub>2</sub>Cl<sub>2</sub>): δ 135.87, 129.77, 128.86, 127.96. Anal. Calcd. for C<sub>90</sub>H<sub>75</sub>O<sub>5</sub>Si<sub>5</sub>Ta·C<sub>6</sub>H<sub>6</sub>: C, 70.48; H, 4.99. Found: C, 70.38; H, 4.67.

**Cp\*Cl<sub>2</sub>Re=N-*p*-C<sub>6</sub>H<sub>4</sub>Me (13).** Compound **3** (100 mg, 0.0388 mmol, 1.00 equiv) was dissolved in 10 mL of benzene and 223 mg (0.546 mmol, 14.1 equiv) of Cp\*Cl<sub>2</sub>Re=O was added. The mixture was

transferred to a Pyrex reaction vessel fitted with a vacuum stopcock and heated at 130 °C for 24 h, during which time the solution became deep green in color and a black precipitate formed. NMR tube experiments showed reaction at 75 °C but longer reaction times were necessary at that temperature. Upon cooling, crystalline **13** precipitated. The solvent was removed under vacuum, and the residue was extracted with 15 mL of hot THF. After the extract had cooled to ambient temperature, it was cooled at -30 °C overnight. The supernatant was then removed by pipette and the large green crystals of **13**·0.5THF (176 mg, 0.330 mmol, 61%) were washed with Et<sub>2</sub>O (3 × 1 mL). Some of these crystals were suitable for X-ray diffraction analysis. Note: One half of a molecule of THF was located in the asymmetric unit and thus this formulation was used to calculate the yield and elemental analysis. NMR spectra showed that bulk sample only contained 0.43 equivalents of THF per molecule of **13**. <sup>1</sup>H NMR (500 MHz, CD<sub>2</sub>Cl<sub>2</sub>): δ 7.46 (d, *J* = 8.5 Hz, 2H), 7.12 (d, *J* = 8.5 Hz, 2H), 2.250 (s, 3H), 2.095 (s, 15H). <sup>13</sup>C {<sup>1</sup>H} NMR (125.8 MHz, CD<sub>2</sub>Cl<sub>2</sub>): δ 155.21, 140.07, 130.75, 123.67, 109.03, 22.30, 12.64. Anal. Calcd. for C<sub>17</sub>H<sub>22</sub>Cl<sub>2</sub>NRe: C, 41.04; H, 4.46; N, 2.81. Anal. Calcd. for C<sub>17</sub>H<sub>22</sub>Cl<sub>2</sub>NRe·0.5C<sub>4</sub>H<sub>8</sub>O: C, 42.77; H, 4.91; N, 2.62. Found: C, 42.19; H, 4.66; N, 2.96.

**Cp\*Cl<sub>2</sub>Re=N-*p*-C<sub>6</sub>H<sub>4</sub>-*t*-Bu (14).** Compound **5** (10 mg, 0.0032 mmol, 1.0 equiv) was dissolved in 0.5 mL of THF-*d*<sub>8</sub>, and the solution was added to a vial containing 18 mg (0.044 mmol, 14 equiv) of Cp\*Cl<sub>2</sub>Re=O. The reaction mixture was then transferred to an NMR tube and flame sealed under reduced pressure. The NMR tube was heated and the reaction was periodically monitored by <sup>1</sup>H NMR. Very little conversion was observed after 7 h at 75 °C; however, signals assigned to **14** were the only observed resonances after the reaction mixture was heated for 14 h at 135 °C. The reaction mixture was filtered and the solvent was removed under reduced pressure (18 mg, 0.033 mmol, 75%). <sup>1</sup>H NMR (500 MHz, CD<sub>2</sub>Cl<sub>2</sub>): δ 7.50 (d, *J* = 9.0 Hz, 2H), 7.33 (d, *J* = 9.0 Hz, 2H), 2.11 (s, 15H), 1.31 (s, 9H). <sup>13</sup>C {<sup>1</sup>H} NMR (125.8 MHz, CD<sub>2</sub>Cl<sub>2</sub>): δ 155.08, 152.96, 127.15, 123.44, 109.06, 35.88, 31.04, 12.69. Anal. Calcd. for C<sub>20</sub>H<sub>28</sub>Cl<sub>2</sub>NRe: C, 44.52; H, 5.23; N, 2.60. Found: C, 44.23; H, 5.12; N, 2.88.

## II. Electrospray Mass Spectra for 3 and 4, Including $^{17}\text{O}$ -, $^{18}\text{O}$ -Enriched Samples

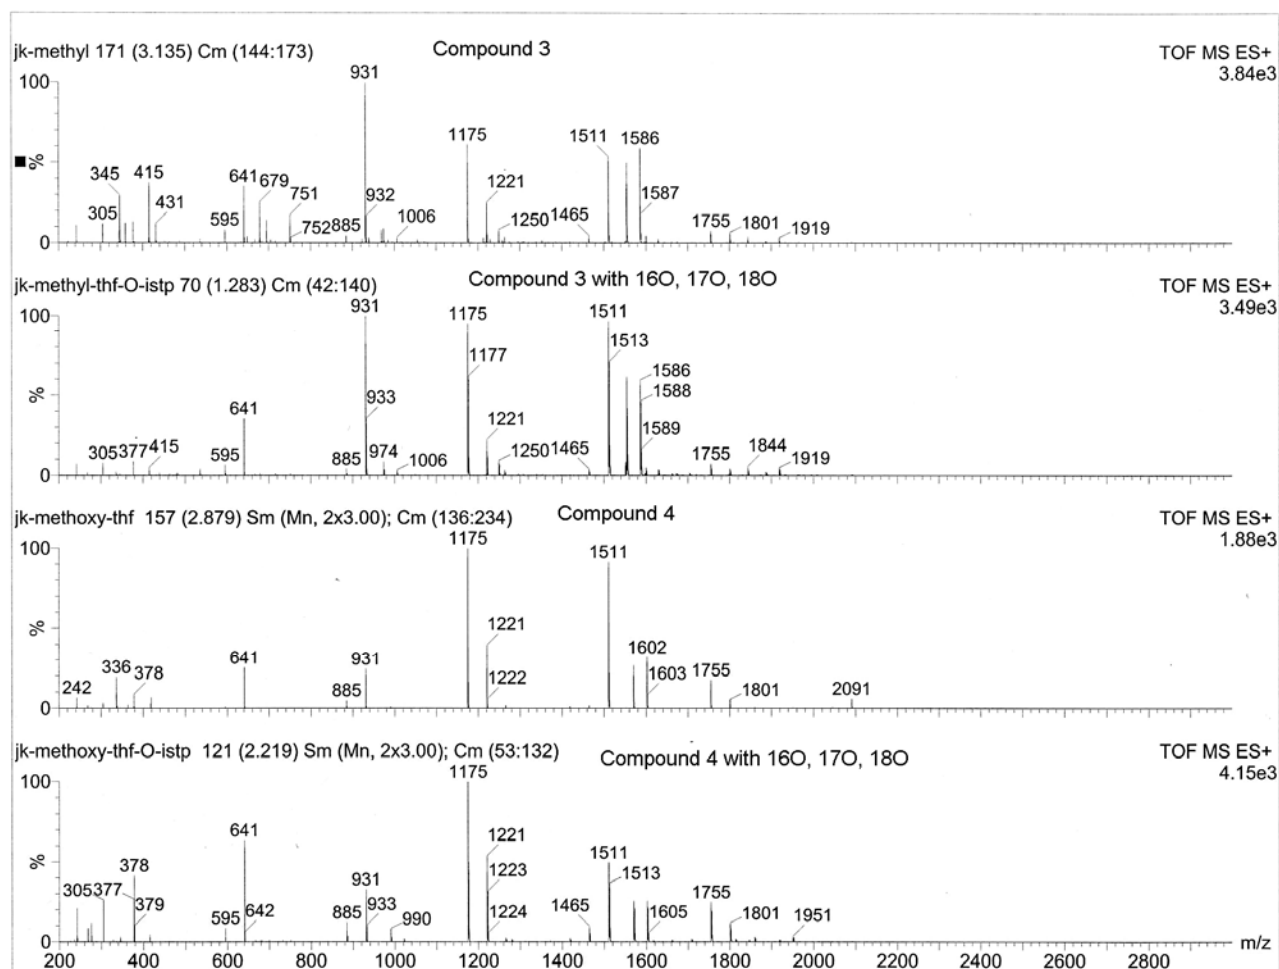

**Figure S1.** ESI mass spectra of **3**, **3**( $^{17,18}\text{O}$ ), **4**, and **4**( $^{17,18}\text{O}$ ) (from top down, respectively). Full spectral width.

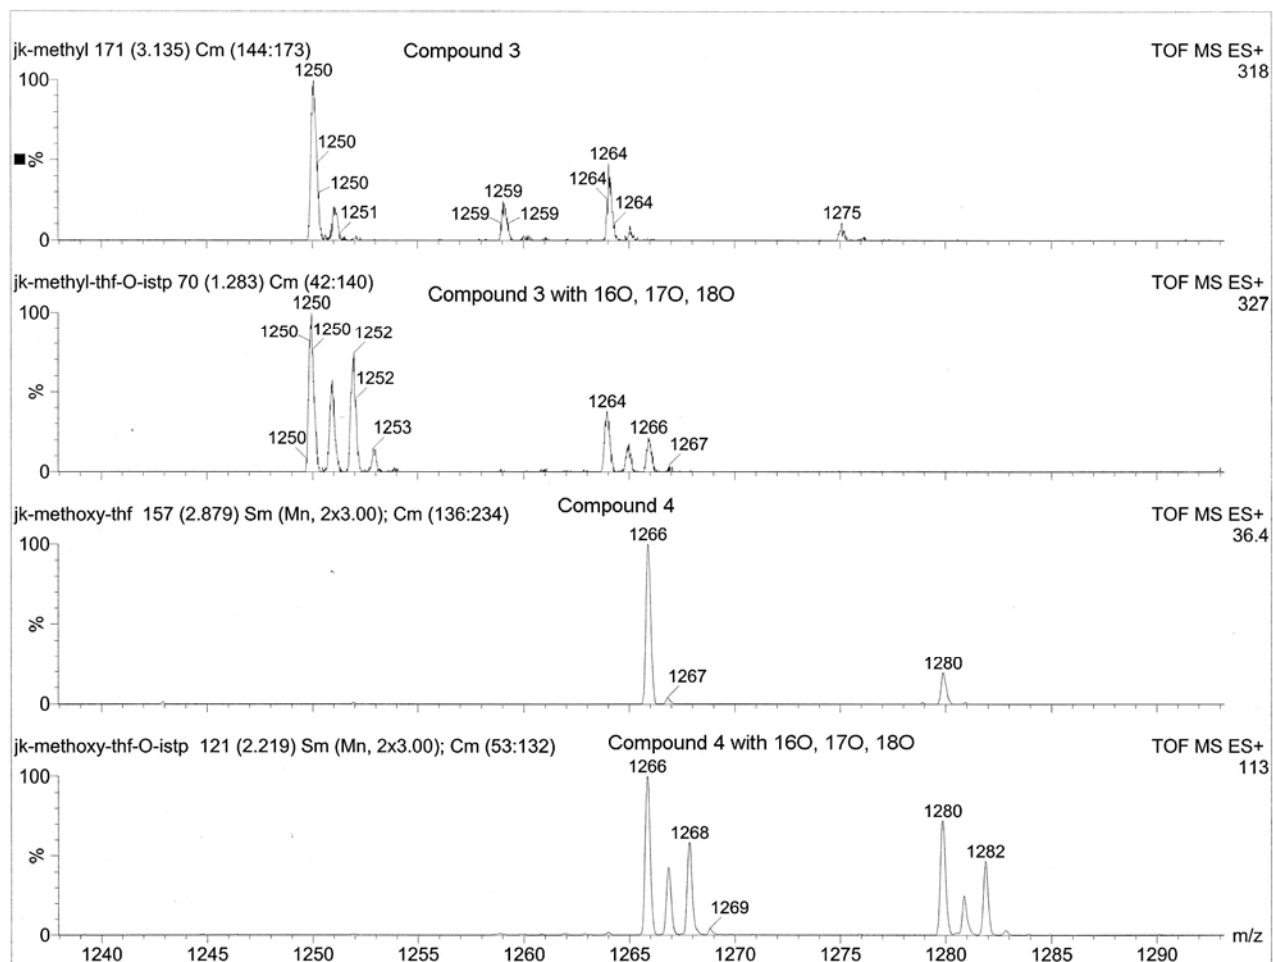

**Figure S2.** Enlargement #1, showing 16 Da shifts of compound **4** peaks relative to those of **3**.

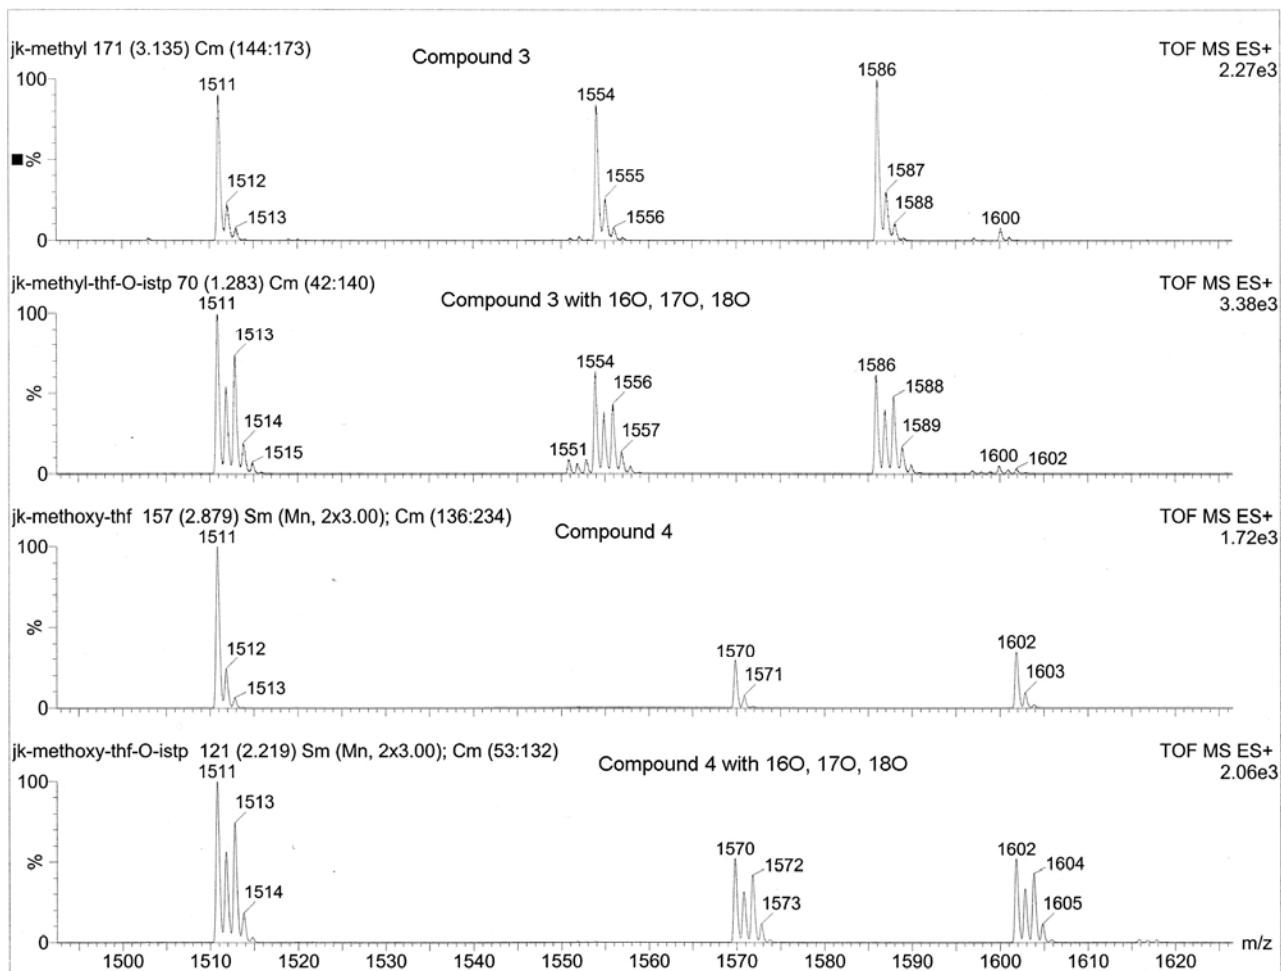

**Figure S3.** Enlargement #2, showing peak that is common to **3** and **4**, no ligands remaining on cluster core.

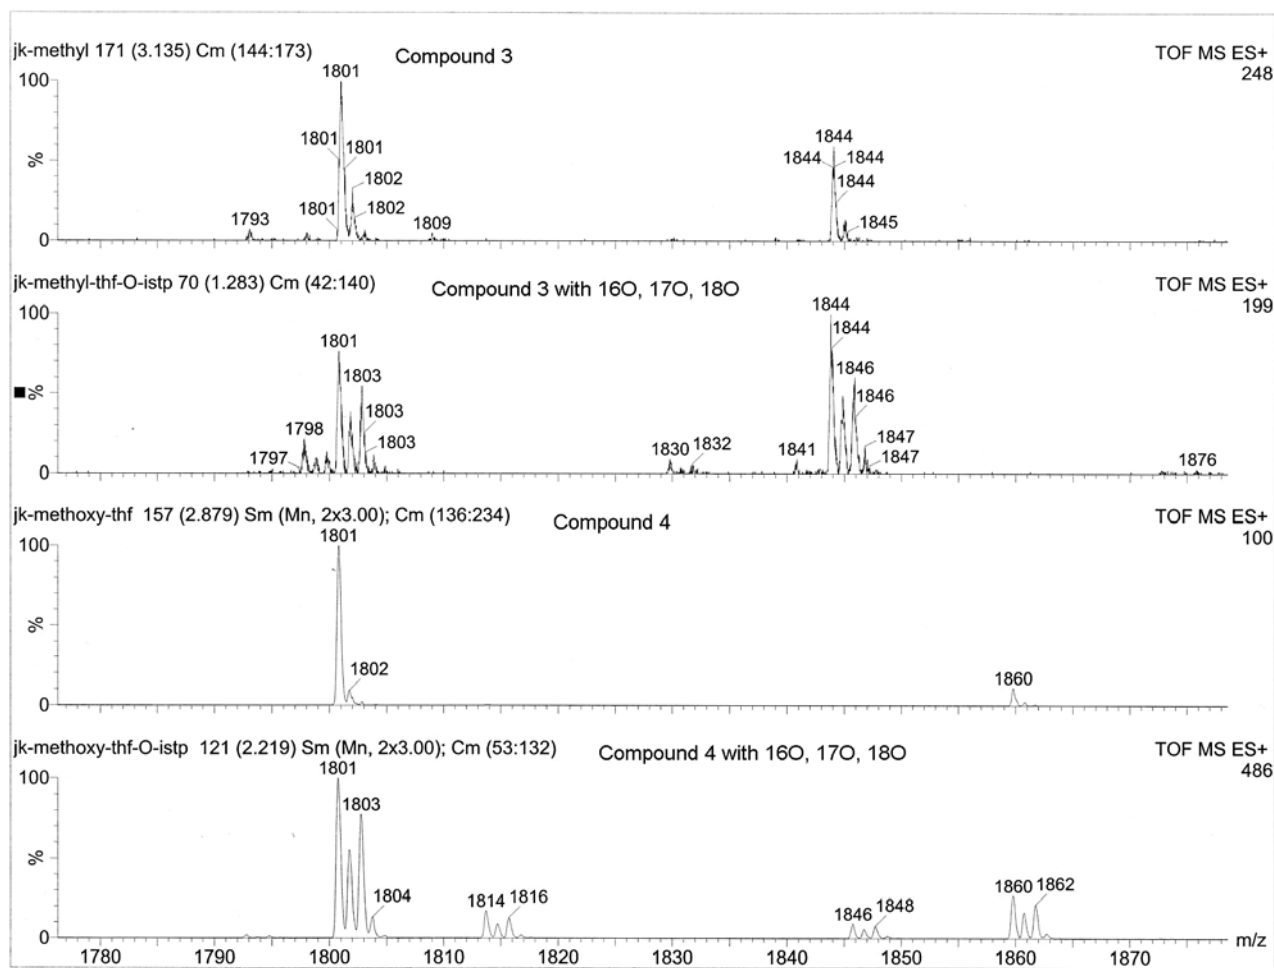

**Figure S4.** Enlargement #3, showing higher-mass peaks.

### III. Positional coordinates of computed structures.

**Table S1.** Calculated coordinates for optimized **2**, unconstrained.

|     |               |               |               |
|-----|---------------|---------------|---------------|
| Ta1 | 1.2806743833  | -0.8537378180 | 1.5971574106  |
| Ta2 | 0.1572970891  | 2.0112842388  | 0.9697664333  |
| Ta3 | -1.8100981746 | -0.4348225289 | 1.1928484134  |
| N4  | -0.2459704993 | 0.4426922028  | 2.4684537392  |
| N5  | 2.1322883908  | 1.0258682528  | 0.9017255418  |
| N6  | 2.2963615069  | -1.5854991031 | 2.8718160051  |
| N7  | 0.2779376663  | 3.6086951996  | 1.7607308190  |
| N8  | 0.4720756545  | 2.1820154373  | -1.1977352550 |
| N9  | -1.8999774085 | 1.6155086839  | 0.3754197685  |
| N10 | -3.2759591765 | -0.7994299133 | 2.1503842702  |
| O11 | 0.0047097086  | 0.0131439042  | -0.0039601891 |
| C12 | -0.3715422756 | 0.5462608774  | 3.8923886073  |
| C13 | -0.1036635726 | 1.7391893568  | 4.5796361817  |
| H14 | 0.1958538477  | 2.6207525502  | 4.0242482342  |
| C15 | -0.2215297416 | 1.7979643395  | 5.9687029083  |

|     |               |               |               |
|-----|---------------|---------------|---------------|
| H16 | -0.0092860434 | 2.7349305122  | 6.4771152386  |
| C17 | -0.6026969401 | 0.6737025869  | 6.7019867278  |
| H18 | -0.6909100408 | 0.7244392244  | 7.7837884831  |
| C19 | -0.8667262502 | -0.5185744253 | 6.0259882814  |
| H20 | -1.1612113902 | -1.4082868954 | 6.5768559207  |
| C21 | -0.7537674555 | -0.5834512471 | 4.6392821199  |
| H22 | -0.9573369144 | -1.5201158017 | 4.1278861355  |
| C23 | 3.2953218147  | 1.6978295268  | 1.3981479109  |
| C24 | 3.8275348826  | 1.4091295638  | 2.6647411592  |
| H25 | 3.3566410629  | 0.6545721500  | 3.2851788691  |
| C26 | 4.9600439590  | 2.0773064419  | 3.1274416764  |
| H27 | 5.3530276217  | 1.8317890590  | 4.1106900731  |
| C28 | 5.5855391416  | 3.0469123757  | 2.3442285083  |
| H29 | 6.4699321639  | 3.5624270710  | 2.7080288185  |
| C30 | 5.0583213812  | 3.3472598441  | 1.0876952903  |
| H31 | 5.5282747224  | 4.1019720542  | 0.4625765007  |
| C32 | 3.9255116725  | 2.6851422753  | 0.6203330722  |
| H33 | 3.5253327472  | 2.9298151442  | -0.3586589119 |
| C34 | 3.0635336594  | -2.1902246561 | 3.8451181281  |
| C35 | 4.0509835853  | -3.1278249887 | 3.4899718331  |
| H36 | 4.2095927902  | -3.3534383514 | 2.4396899502  |
| C37 | 4.8158552086  | -3.7416295927 | 4.4772949127  |
| H38 | 5.5757743384  | -4.4647215089 | 4.1916118154  |
| C39 | 4.6140501205  | -3.4340901375 | 5.8242182655  |
| H40 | 5.2141171556  | -3.9167714162 | 6.5909221821  |
| C41 | 3.6363444193  | -2.5029149198 | 6.1799438918  |
| H42 | 3.4719301122  | -2.2593809537 | 7.2265762648  |
| C43 | 2.8626420560  | -1.8817657770 | 5.2033906085  |
| H44 | 2.0901390833  | -1.1670148122 | 5.4719095530  |
| C45 | 0.3628083449  | 4.8364732702  | 2.3839802365  |
| C46 | 1.6119939554  | 5.3343539625  | 2.7994707005  |
| H47 | 2.5032107183  | 4.7416629677  | 2.6122847910  |
| C48 | 1.6908588663  | 6.5696812311  | 3.4357003348  |
| H49 | 2.6597022848  | 6.9459407991  | 3.7541524162  |
| C50 | 0.5381434493  | 7.3230312643  | 3.6658239126  |
| H51 | 0.6061444386  | 8.2862762339  | 4.1642693428  |
| C52 | -0.7024896965 | 6.8322211183  | 3.2531400665  |
| H53 | -1.6040007162 | 7.4134363182  | 3.4296249416  |
| C54 | -0.7979457927 | 5.5984674946  | 2.6157389536  |
| H55 | -1.7587733726 | 5.2047443332  | 2.2963819269  |
| C56 | 0.6766234825  | 3.3600946347  | -1.9838291286 |
| C57 | 1.0040544702  | 3.2497691366  | -3.3478545451 |
| H58 | 1.1110873328  | 2.2658611328  | -3.7958446104 |
| C59 | 1.1831253971  | 4.3871698623  | -4.1318158827 |
| H60 | 1.4313650739  | 4.2727454495  | -5.1838264297 |
| C61 | 1.0427285747  | 5.6602216496  | -3.5757560562 |
| H62 | 1.1824549739  | 6.5469554691  | -4.1877502392 |
| C63 | 0.7177796879  | 5.7775560538  | -2.2246017181 |
| H64 | 0.6023039151  | 6.7597776783  | -1.7734669623 |
| C65 | 0.5337894373  | 4.6431367073  | -1.4343870201 |
| H66 | 0.2788424737  | 4.7504524551  | -0.3858201228 |



|      |               |               |               |
|------|---------------|---------------|---------------|
| C67  | -2.9337707458 | 2.5720098040  | 0.6240569355  |
| C68  | -3.6184841225 | 2.5984271410  | 1.8513932926  |
| H69  | -3.3684090532 | 1.8758075539  | 2.6205240307  |
| C70  | -4.6205213021 | 3.5365331451  | 2.0884584905  |
| H71  | -5.1363797712 | 3.5305740569  | 3.0452107282  |
| C72  | -4.9597620523 | 4.4733919312  | 1.1111934319  |
| H73  | -5.7429531504 | 5.2033643942  | 1.2959777160  |
| C74  | -4.2776754492 | 4.4600882846  | -0.1057686037 |
| H75  | -4.5242127023 | 5.1830469490  | -0.8789950213 |
| C76  | -3.2744210352 | 3.5231726866  | -0.3491789246 |
| H77  | -2.7562341096 | 3.5243622915  | -1.3032267446 |
| C78  | -4.3960045950 | -1.0864358024 | 2.9032978559  |
| C79  | -4.4849277867 | -0.6518645544 | 4.2396572743  |
| H80  | -3.6560114358 | -0.0975635074 | 4.6691504969  |
| C81  | -5.6133399760 | -0.9499022367 | 4.9981658665  |
| H82  | -5.6689511583 | -0.6104992271 | 6.0295442267  |
| C83  | -6.6661393076 | -1.6812520855 | 4.4451418375  |
| H84  | -7.5441904735 | -1.9128497292 | 5.0420295344  |
| C85  | -6.5827200436 | -2.1139024227 | 3.1205001511  |
| H86  | -7.3987254494 | -2.6825715838 | 2.6816114802  |
| C87  | -5.4608352121 | -1.8220415880 | 2.3497100265  |
| H88  | -5.3965722317 | -2.1441045717 | 1.3147606515  |
| Ta89 | -1.2715442143 | 0.8839694287  | -1.6025761335 |
| Ta90 | -0.1443228855 | -1.9887385192 | -0.9685264689 |
| Ta91 | 1.8123771318  | 0.4567723414  | -1.2045765289 |
| N92  | 0.2424450042  | -0.4284393375 | -2.4768448266 |
| N93  | -2.1289135483 | -0.9944216154 | -0.8931372313 |
| N94  | -2.3034713854 | 1.5953122157  | -2.8746438851 |
| N95  | -0.2794642053 | -3.6023866744 | -1.7246974866 |
| N96  | -0.4584365595 | -2.1581735754 | 1.1831116860  |
| N97  | 1.9165318915  | -1.5846597216 | -0.3844573947 |
| N98  | 3.2713527105  | 0.7979393182  | -2.1782941016 |
| C99  | 0.3580492545  | -0.7776678697 | -3.8606834990 |
| C100 | -0.7699727477 | -0.7906105824 | -4.6982341219 |
| H101 | -1.7401955903 | -0.5177169910 | -4.2955928216 |
| C102 | -0.6577468568 | -1.1417634149 | -6.0424528023 |
| H103 | -1.5495994324 | -1.1383180112 | -6.6638602696 |
| C104 | 0.5780966789  | -1.4934859070 | -6.5877963982 |
| H105 | 0.6621045384  | -1.7654073375 | -7.6359639944 |
| C106 | 1.7034473283  | -1.4880847321 | -5.7618893432 |
| H107 | 2.6770820895  | -1.7585454337 | -6.1622061792 |
| C108 | 1.5976756913  | -1.1389386950 | -4.4160739388 |
| H109 | 2.4842452257  | -1.1402252638 | -3.7905097377 |
| C110 | -3.3965108196 | -1.4632677610 | -1.3656139175 |
| C111 | -4.5492006092 | -0.6827858421 | -1.1591789693 |
| H112 | -4.4659546867 | 0.2701838626  | -0.6441095867 |
| C113 | -5.7945218503 | -1.1185061194 | -1.6057696324 |
| H114 | -6.6689100147 | -0.4971078484 | -1.4294929442 |
| C115 | -5.9201754036 | -2.3402933075 | -2.2700827153 |
| H116 | -6.8918266216 | -2.6809659407 | -2.6169521212 |
| C117 | -4.7811561644 | -3.1164636455 | -2.4821601287 |

|      |               |               |               |
|------|---------------|---------------|---------------|
| H118 | -4.8589066097 | -4.0700813312 | -2.9981301695 |
| C119 | -3.5311053760 | -2.6864684175 | -2.0374536850 |
| H120 | -2.6561730361 | -3.3027864571 | -2.2084569176 |
| C121 | -3.1127120915 | 2.1603205171  | -3.8383171991 |
| C122 | -4.2306867997 | 1.4626313910  | -4.3315071632 |
| H123 | -4.4506090807 | 0.4749658496  | -3.9374802636 |
| C124 | -5.0459665602 | 2.0465006499  | -5.2968596809 |
| H125 | -5.9087501507 | 1.4994806695  | -5.6689113970 |
| C126 | -4.7651448832 | 3.3249054455  | -5.7832603070 |
| H127 | -5.4066409944 | 3.7770619217  | -6.5349110811 |
| C128 | -3.6551839909 | 4.0187856738  | -5.2971334515 |
| H129 | -3.4286622783 | 5.0140666838  | -5.6712167376 |
| C130 | -2.8305724187 | 3.4470438253  | -4.3324895590 |
| H131 | -1.9615936360 | 3.9774243288  | -3.9534318327 |
| C132 | -0.4135815931 | -4.8484876692 | -2.3052684243 |
| C133 | -0.7777745486 | -5.9663248822 | -1.5283699623 |
| H134 | -0.9481583469 | -5.8333487956 | -0.4637750357 |
| C135 | -0.9212822379 | -7.2138722055 | -2.1292654490 |
| H136 | -1.2043431570 | -8.0706338823 | -1.5229750568 |
| C137 | -0.7069117347 | -7.3677652863 | -3.5005180876 |
| H138 | -0.8222836833 | -8.3431403410 | -3.9656960213 |
| C139 | -0.3446162506 | -6.2618236973 | -4.2716221354 |
| H140 | -0.1759996981 | -6.3751742228 | -5.3394781753 |
| C141 | -0.1970752290 | -5.0075363491 | -3.6860015705 |
| H142 | 0.0829289780  | -4.1409238903 | -4.2782895006 |
| C143 | -0.6985120285 | -3.4313582629 | 1.7913774833  |
| C144 | -2.0070773612 | -3.9107581865 | 1.9712840039  |
| H145 | -2.8480739731 | -3.3043881322 | 1.6520432691  |
| C146 | -2.2376314140 | -5.1509594939 | 2.5634053526  |
| H147 | -3.2610549989 | -5.4931357048 | 2.6939475569  |
| C148 | -1.1715533937 | -5.9462135529 | 2.9842326695  |
| H149 | -1.3534136447 | -6.9118509016 | 3.4478161382  |
| C150 | 0.1317312570  | -5.4835753079 | 2.8000672323  |
| H151 | 0.9774162232  | -6.0876939291 | 3.1184081234  |
| C152 | 0.3686163732  | -4.2439408892 | 2.2083144156  |
| H153 | 1.3889131146  | -3.8999411922 | 2.0765673958  |
| C154 | 3.0835101270  | -2.4033214644 | -0.5199639341 |
| C155 | 3.0127185060  | -3.7181467277 | -1.0042551535 |
| H156 | 2.0526364281  | -4.1287022057 | -1.2945247340 |
| C157 | 4.1654271855  | -4.4946427967 | -1.1170134962 |
| H158 | 4.0830996764  | -5.5098152514 | -1.4968337874 |
| C159 | 5.4097600620  | -3.9822360760 | -0.7495486743 |
| H160 | 6.3047438414  | -4.5916955116 | -0.8389240919 |
| C161 | 5.4894161829  | -2.6747889161 | -0.2658353626 |
| H162 | 6.4486575672  | -2.2551792804 | 0.0263269156  |
| C163 | 4.3421422205  | -1.8926525574 | -0.1520379946 |
| H164 | 4.4197087022  | -0.8777944305 | 0.2280438241  |
| C165 | 4.3884653931  | 1.0371412418  | -2.9497263911 |
| C166 | 5.2555743313  | -0.0188063774 | -3.2882590909 |
| H167 | 5.0448569777  | -1.0153310046 | -2.9115438420 |
| C168 | 6.3719121770  | 0.2227262614  | -4.0837501551 |

|      |              |               |               |
|------|--------------|---------------|---------------|
| H169 | 7.0334885579 | -0.6011934980 | -4.3393034838 |
| C170 | 6.6450961803 | 1.5097476016  | -4.5505016377 |
| H171 | 7.5169369639 | 1.6924980301  | -5.1728346597 |
| C172 | 5.7905842063 | 2.5608059050  | -4.2126341942 |
| H173 | 5.9958336606 | 3.5662134397  | -4.5715383172 |
| C174 | 4.6702537627 | 2.3337093013  | -3.4189100750 |
| H175 | 3.9942482895 | 3.1441972493  | -3.1631001794 |

**Table S2.** Calculated coordinates for  $C_i$ -optimized **2**.

|     |               |               |               |
|-----|---------------|---------------|---------------|
| Ta1 | 1.2792696352  | -0.9206652122 | 1.5736753355  |
| Ta2 | 0.2060455097  | 1.9833567331  | 0.9806115666  |
| Ta3 | -1.8088255836 | -0.4273567693 | 1.2170053725  |
| N4  | -0.2040941221 | 0.3947175746  | 2.4764755010  |
| N5  | 2.1754757491  | 0.9094017597  | 0.9059241824  |
| N6  | 2.2907007824  | -1.7218594681 | 2.8117794926  |
| N7  | 0.4349557612  | 3.5725637237  | 1.7644629300  |
| N8  | 0.5451980369  | 2.1728011567  | -1.1670576029 |
| N9  | -1.8508676926 | 1.6652733032  | 0.4382430588  |
| N10 | -3.2941999681 | -0.7575413702 | 2.1549412685  |
| O11 | 0.0000000000  | 0.0000000000  | 0.0000000000  |
| C12 | -0.3062871444 | 0.7738951731  | 3.8509594451  |
| C13 | 0.7982117100  | 0.6975878133  | 4.7146509825  |
| H14 | 1.7487380385  | 0.3329557894  | 4.3380206048  |
| C15 | 0.6861467758  | 1.0856675521  | 6.0489282211  |
| H16 | 1.5565348238  | 1.0105929950  | 6.6964596374  |
| C17 | -0.5230054332 | 1.5674451770  | 6.5513229655  |
| H18 | -0.6061463528 | 1.8692141749  | 7.5919932134  |
| C19 | -1.6216129163 | 1.6626984342  | 5.6962225772  |
| H20 | -2.5705871049 | 2.0455939134  | 6.0638198440  |
| C21 | -1.5163698765 | 1.2737750666  | 4.3625989213  |
| H22 | -2.3787306584 | 1.3578790516  | 3.7077467258  |
| C23 | 3.3839518773  | 1.5489229644  | 1.3310008455  |
| C24 | 4.3019630879  | 0.9132659800  | 2.1815829369  |
| H25 | 4.0988800787  | -0.0929828892 | 2.5309936314  |
| C26 | 5.4657948124  | 1.5674003389  | 2.5856698607  |
| H27 | 6.1593325682  | 1.0528327128  | 3.2466535929  |
| C28 | 5.7402394683  | 2.8654008537  | 2.1567583228  |
| H29 | 6.6460959722  | 3.3727311947  | 2.4778794453  |
| C30 | 4.8338990441  | 3.5045216495  | 1.3094739761  |
| H31 | 5.0262588954  | 4.5170890200  | 0.9635752055  |
| C32 | 3.6726100149  | 2.8559801355  | 0.8989428824  |
| H33 | 2.9783068384  | 3.3690053734  | 0.2399955124  |
| C34 | 3.0569554648  | -2.3803015742 | 3.7516277150  |
| C35 | 4.2951920193  | -2.9444952228 | 3.3910477652  |
| H36 | 4.6282923767  | -2.8686315786 | 2.3596113537  |
| C37 | 5.0700778343  | -3.5951596980 | 4.3472031878  |
| H38 | 6.0246605740  | -4.0275181075 | 4.0564825047  |
| C39 | 4.6311908977  | -3.6947605645 | 5.6685268003  |
| H40 | 5.2411757176  | -4.2031751518 | 6.4107669471  |
| C41 | 3.4021638230  | -3.1391745765 | 6.0298891889  |

|      |               |               |               |
|------|---------------|---------------|---------------|
| H42  | 3.0510158658  | -3.2145534868 | 7.0562429247  |
| C43  | 2.6168210874  | -2.4863278021 | 5.0845978931  |
| H44  | 1.6605423803  | -2.0499206476 | 5.3578098065  |
| C45  | 0.6491723913  | 4.7863049571  | 2.3834555104  |
| C46  | 0.7431947644  | 5.9651546566  | 1.6200170167  |
| H47  | 0.6490699902  | 5.9004242857  | 0.5391929943  |
| C48  | 0.9506041688  | 7.1895060768  | 2.2496777296  |
| H49  | 1.0231660679  | 8.0935833490  | 1.6494258518  |
| C50  | 1.0663872218  | 7.2599938203  | 3.6386096808  |
| H51  | 1.2261181260  | 8.2185013233  | 4.1258951549  |
| C52  | 0.9751014252  | 6.0918252296  | 4.3989783779  |
| H53  | 1.0652012493  | 6.1393660934  | 5.4815205488  |
| C54  | 0.7690390183  | 4.8609336310  | 3.7837549305  |
| H55  | 0.6948227073  | 3.9473484965  | 4.3672507794  |
| C56  | 0.7186345497  | 3.4399131000  | -1.8123031319 |
| C57  | 1.9254936414  | 3.7924316562  | -2.4346555162 |
| H58  | 2.7548577550  | 3.0947597270  | -2.4250511781 |
| C59  | 2.0609881124  | 5.0244860718  | -3.0733444452 |
| H60  | 3.0063202604  | 5.2710094035  | -3.5507718031 |
| C61  | 1.0008456398  | 5.9289233304  | -3.1103043883 |
| H62  | 1.1087808696  | 6.8852122459  | -3.6151072141 |
| C63  | -0.2034768238 | 5.5872032378  | -2.4929222996 |
| H64  | -1.0449730680 | 6.2754811199  | -2.5129490319 |
| C65  | -0.3439107105 | 4.3607841811  | -1.8482428344 |
| H66  | -1.2889628253 | 4.1095520007  | -1.3749971050 |
| C67  | -2.9902567402 | 2.5058245121  | 0.6455141426  |
| C68  | -2.8627514971 | 3.8296224671  | 1.0935170180  |
| H69  | -1.8764007026 | 4.2320602240  | 1.2961121547  |
| C70  | -3.9926545593 | 4.6198649153  | 1.3019284241  |
| H71  | -3.8652547684 | 5.6405359319  | 1.6546581610  |
| C72  | -5.2709152896 | 4.1135557050  | 1.0709336278  |
| H73  | -6.1481109650 | 4.7317385106  | 1.2421074862  |
| C74  | -5.4077939045 | 2.8006042713  | 0.6171758900  |
| H75  | -6.3950464000 | 2.3835907340  | 0.4330563041  |
| C76  | -4.2835951241 | 2.0079780460  | 0.4003004788  |
| H77  | -4.4067179747 | 0.9891556884  | 0.0444977211  |
| C78  | -4.4656403691 | -0.9997955765 | 2.8411297247  |
| C79  | -4.4849715649 | -0.9895904744 | 4.2481797070  |
| H80  | -3.5649857758 | -0.7767431022 | 4.7847517288  |
| C81  | -5.6709280059 | -1.2402526938 | 4.9317452725  |
| H82  | -5.6741011075 | -1.2262212582 | 6.0191425861  |
| C83  | -6.8490916988 | -1.5086640692 | 4.2326342127  |
| H84  | -7.7721834314 | -1.7052520677 | 4.7719189874  |
| C85  | -6.8335154522 | -1.5250623723 | 2.8365242301  |
| H86  | -7.7454604736 | -1.7386119635 | 2.2841042195  |
| C87  | -5.6550323808 | -1.2744380750 | 2.1399791165  |
| H88  | -5.6325031731 | -1.2960176711 | 1.0540967970  |
| Ta89 | -1.2792696352 | 0.9206652122  | -1.5736753355 |
| Ta90 | -0.2060455097 | -1.9833567331 | -0.9806115666 |
| Ta91 | 1.8088255836  | 0.4273567693  | -1.2170053725 |
| N92  | 0.2040941221  | -0.3947175746 | -2.4764755010 |

|      |               |               |               |
|------|---------------|---------------|---------------|
| N93  | -2.1754757491 | -0.9094017597 | -0.9059241824 |
| N94  | -2.2907007824 | 1.7218594681  | -2.8117794926 |
| N95  | -0.4349557612 | -3.5725637237 | -1.7644629300 |
| N96  | -0.5451980369 | -2.1728011567 | 1.1670576029  |
| N97  | 1.8508676926  | -1.6652733032 | -0.4382430588 |
| N98  | 3.2941999681  | 0.7575413702  | -2.1549412685 |
| C99  | 0.3062871444  | -0.7738951731 | -3.8509594451 |
| C100 | -0.7982117100 | -0.6975878133 | -4.7146509825 |
| H101 | -1.7487380385 | -0.3329557894 | -4.3380206048 |
| C102 | -0.6861467758 | -1.0856675521 | -6.0489282211 |
| H103 | -1.5565348238 | -1.0105929950 | -6.6964596374 |
| C104 | 0.5230054332  | -1.5674451770 | -6.5513229655 |
| H105 | 0.6061463528  | -1.8692141749 | -7.5919932134 |
| C106 | 1.6216129163  | -1.6626984342 | -5.6962225772 |
| H107 | 2.5705871049  | -2.0455939134 | -6.0638198440 |
| C108 | 1.5163698765  | -1.2737750666 | -4.3625989213 |
| H109 | 2.3787306584  | -1.3578790516 | -3.7077467258 |
| C110 | -3.3839518773 | -1.5489229644 | -1.3310008455 |
| C111 | -4.3019630879 | -0.9132659800 | -2.1815829369 |
| H112 | -4.0988800787 | 0.0929828892  | -2.5309936314 |
| C113 | -5.4657948124 | -1.5674003389 | -2.5856698607 |
| H114 | -6.1593325682 | -1.0528327128 | -3.2466535929 |
| C115 | -5.7402394683 | -2.8654008537 | -2.1567583228 |
| H116 | -6.6460959722 | -3.3727311947 | -2.4778794453 |
| C117 | -4.8338990441 | -3.5045216495 | -1.3094739761 |
| H118 | -5.0262588954 | -4.5170890200 | -0.9635752055 |
| C119 | -3.6726100149 | -2.8559801355 | -0.8989428824 |
| H120 | -2.9783068384 | -3.3690053734 | -0.2399955124 |
| C121 | -3.0569554648 | 2.3803015742  | -3.7516277150 |
| C122 | -4.2951920193 | 2.9444952228  | -3.3910477652 |
| H123 | -4.6282923767 | 2.8686315786  | -2.3596113537 |
| C124 | -5.0700778343 | 3.5951596980  | -4.3472031878 |
| H125 | -6.0246605740 | 4.0275181075  | -4.0564825047 |
| C126 | -4.6311908977 | 3.6947605645  | -5.6685268003 |
| H127 | -5.2411757176 | 4.2031751518  | -6.4107669471 |
| C128 | -3.4021638230 | 3.1391745765  | -6.0298891889 |
| H129 | -3.0510158658 | 3.2145534868  | -7.0562429247 |
| C130 | -2.6168210874 | 2.4863278021  | -5.0845978931 |
| H131 | -1.6605423803 | 2.0499206476  | -5.3578098065 |
| C132 | -0.6491723913 | -4.7863049571 | -2.3834555104 |
| C133 | -0.7431947644 | -5.9651546566 | -1.6200170167 |
| H134 | -0.6490699902 | -5.9004242857 | -0.5391929943 |
| C135 | -0.9506041688 | -7.1895060768 | -2.2496777296 |
| H136 | -1.0231660679 | -8.0935833490 | -1.6494258518 |
| C137 | -1.0663872218 | -7.2599938203 | -3.6386096808 |
| H138 | -1.2261181260 | -8.2185013233 | -4.1258951549 |
| C139 | -0.9751014252 | -6.0918252296 | -4.3989783779 |
| H140 | -1.0652012493 | -6.1393660934 | -5.4815205488 |
| C141 | -0.7690390183 | -4.8609336310 | -3.7837549305 |
| H142 | -0.6948227073 | -3.9473484965 | -4.3672507794 |
| C143 | -0.7186345497 | -3.4399131000 | 1.8123031319  |

|      |               |               |               |
|------|---------------|---------------|---------------|
| C144 | -1.9254936414 | -3.7924316562 | 2.4346555162  |
| H145 | -2.7548577550 | -3.0947597270 | 2.4250511781  |
| C146 | -2.0609881124 | -5.0244860718 | 3.0733444452  |
| H147 | -3.0063202604 | -5.2710094035 | 3.5507718031  |
| C148 | -1.0008456398 | -5.9289233304 | 3.1103043883  |
| H149 | -1.1087808696 | -6.8852122459 | 3.6151072141  |
| C150 | 0.2034768238  | -5.5872032378 | 2.4929222996  |
| H151 | 1.0449730680  | -6.2754811199 | 2.5129490319  |
| C152 | 0.3439107105  | -4.3607841811 | 1.8482428344  |
| H153 | 1.2889628253  | -4.1095520007 | 1.3749971050  |
| C154 | 2.9902567402  | -2.5058245121 | -0.6455141426 |
| C155 | 2.8627514971  | -3.8296224671 | -1.0935170180 |
| H156 | 1.8764007026  | -4.2320602240 | -1.2961121547 |
| C157 | 3.9926545593  | -4.6198649153 | -1.3019284241 |
| H158 | 3.8652547684  | -5.6405359319 | -1.6546581610 |
| C159 | 5.2709152896  | -4.1135557050 | -1.0709336278 |
| H160 | 6.1481109650  | -4.7317385106 | -1.2421074862 |
| C161 | 5.4077939045  | -2.8006042713 | -0.6171758900 |
| H162 | 6.3950464000  | -2.3835907340 | -0.4330563041 |
| C163 | 4.2835951241  | -2.0079780460 | -0.4003004788 |
| H164 | 4.4067179747  | -0.9891556884 | -0.0444977211 |
| C165 | 4.4656403691  | 0.9997955765  | -2.8411297247 |
| C166 | 4.4849715649  | 0.9895904744  | -4.2481797070 |
| H167 | 3.5649857758  | 0.7767431022  | -4.7847517288 |
| C168 | 5.6709280059  | 1.2402526938  | -4.9317452725 |
| H169 | 5.6741011075  | 1.2262212582  | -6.0191425861 |
| C170 | 6.8490916988  | 1.5086640692  | -4.2326342127 |
| H171 | 7.7721834314  | 1.7052520677  | -4.7719189874 |
| C172 | 6.8335154522  | 1.5250623723  | -2.8365242301 |
| H173 | 7.7454604736  | 1.7386119635  | -2.2841042195 |
| C174 | 5.6550323808  | 1.2744380750  | -2.1399791165 |
| H175 | 5.6325031731  | 1.2960176711  | -1.0540967970 |

**Table S3.** Calculated coordinates for  $C_i$ -optimized **3**.

|     |               |               |               |
|-----|---------------|---------------|---------------|
| Ta1 | 1.2911648475  | -0.9060375040 | 1.5776917436  |
| Ta2 | 0.1946624062  | 1.9867967395  | 0.9777478551  |
| Ta3 | -1.8006018899 | -0.4403472166 | 1.2264390966  |
| N4  | -0.2011589879 | 0.3989993187  | 2.4775766130  |
| N5  | 2.1778538078  | 0.9198198000  | 0.8981969288  |
| N6  | 2.3002499997  | -1.6769515646 | 2.8395050872  |
| N7  | 0.4289794848  | 3.5628436745  | 1.7898415324  |
| N8  | 0.5332727277  | 2.1749552646  | -1.1753355401 |
| N9  | -1.8530160603 | 1.6610950601  | 0.4433484561  |
| N10 | -3.2770435890 | -0.7727683729 | 2.1804835401  |
| O11 | 0.0000000000  | 0.0000000000  | 0.0000000000  |
| C12 | -0.3424310167 | 0.7855539058  | 3.8465433840  |
| C13 | 0.7251525235  | 0.6850344440  | 4.7531456263  |
| H14 | 1.6774952876  | 0.2919746478  | 4.4132386797  |
| C15 | 0.5788387179  | 1.0871111795  | 6.0786034531  |
| H16 | 1.4287769112  | 0.9919975737  | 6.7519114027  |

|     |               |               |               |
|-----|---------------|---------------|---------------|
| C17 | -0.6275812443 | 1.6130121014  | 6.5591595101  |
| C19 | -1.6841085361 | 1.7235334522  | 5.6499248330  |
| H20 | -2.6350340514 | 2.1366905029  | 5.9796717799  |
| C21 | -1.5498306060 | 1.3223269160  | 4.3217914564  |
| H22 | -2.3916169735 | 1.4330902904  | 3.6446786583  |
| C23 | 3.3886462686  | 1.5664674697  | 1.3051399205  |
| C24 | 4.3268774827  | 0.9421077476  | 2.1430934624  |
| H25 | 4.1329924629  | -0.0599224912 | 2.5090142334  |
| C26 | 5.4986886401  | 1.5979774183  | 2.5150054243  |
| H27 | 6.2024931623  | 1.0829474631  | 3.1663462895  |
| C28 | 5.7887414854  | 2.8957077482  | 2.0763129425  |
| C30 | 4.8505731755  | 3.5138286056  | 1.2432723310  |
| H31 | 5.0365167068  | 4.5224348311  | 0.8806015959  |
| C32 | 3.6772660501  | 2.8677379041  | 0.8613451359  |
| H33 | 2.9761878901  | 3.3808942896  | 0.2099760758  |
| C34 | 3.0631748424  | -2.3096681518 | 3.8006435829  |
| C35 | 4.3251305462  | -2.8469398738 | 3.4796256770  |
| H36 | 4.6823034693  | -2.7764538159 | 2.4558381350  |
| C37 | 5.0949324438  | -3.4651050016 | 4.4586755088  |
| H38 | 6.0669180484  | -3.8734704296 | 4.1876985146  |
| C39 | 4.6485127429  | -3.5748610291 | 5.7834319084  |
| C41 | 3.3909165262  | -3.0450529941 | 6.0915039851  |
| H42 | 3.0152246385  | -3.1198216538 | 7.1099338566  |
| C43 | 2.6049133392  | -2.4237708887 | 5.1246461592  |
| H44 | 1.6303959039  | -2.0201672554 | 5.3813229840  |
| C45 | 0.6803204986  | 4.7463281449  | 2.4533142545  |
| C46 | 0.7851879233  | 5.9606798097  | 1.7480731721  |
| H47 | 0.6653354339  | 5.9538072128  | 0.6678601288  |
| C48 | 1.0447687800  | 7.1463170957  | 2.4271574545  |
| H49 | 1.1248537440  | 8.0732049429  | 1.8617478102  |
| C50 | 1.2085279609  | 7.1728528364  | 3.8192369329  |
| C52 | 1.1000130034  | 5.9611094505  | 4.5110397892  |
| H53 | 1.2239026956  | 5.9517820150  | 5.5920631659  |
| C54 | 0.8409315469  | 4.7636676538  | 3.8497377141  |
| H55 | 0.7636834421  | 3.8304595620  | 4.4004203294  |
| C56 | 0.6849611069  | 3.4468885786  | -1.8175585912 |
| C57 | 1.8744999116  | 3.8281968863  | -2.4585646823 |
| H58 | 2.7149549406  | 3.1432402812  | -2.4763790989 |
| C59 | 1.9786946615  | 5.0671377700  | -3.0867943554 |
| H60 | 2.9143781077  | 5.3271516470  | -3.5782416184 |
| C61 | 0.9136881963  | 5.9763289754  | -3.1081210125 |
| C63 | -0.2670831836 | 5.5943932632  | -2.4633341299 |
| H64 | -1.1195797530 | 6.2702761865  | -2.4583662510 |
| C65 | -0.3824716970 | 4.3600259482  | -1.8274836328 |
| H66 | -1.3169087536 | 4.0996254539  | -1.3388287338 |
| C67 | -2.9960720242 | 2.4961712174  | 0.6538720663  |
| C68 | -2.8834638256 | 3.8181021374  | 1.1156470526  |
| H69 | -1.9015159795 | 4.2283637661  | 1.3249526822  |
| C70 | -4.0180044314 | 4.5979718975  | 1.3274792986  |
| H71 | -3.8923770438 | 5.6163175990  | 1.6906191243  |
| C72 | -5.3077168825 | 4.1041890963  | 1.0946677588  |

|      |               |               |               |
|------|---------------|---------------|---------------|
| C74  | -5.4153249558 | 2.7896281328  | 0.6302729628  |
| H75  | -6.3992085839 | 2.3654508190  | 0.4409053604  |
| C76  | -4.2880096393 | 2.0014172238  | 0.4079279315  |
| H77  | -4.4123257825 | 0.9843536128  | 0.0481292008  |
| C78  | -4.4590461642 | -0.9963312059 | 2.8565684671  |
| C79  | -4.5142339215 | -0.9385086131 | 4.2624224027  |
| H80  | -3.6078986945 | -0.7083885318 | 4.8147810296  |
| C81  | -5.7134569697 | -1.1654852465 | 4.9276512883  |
| H82  | -5.7332314981 | -1.1145304369 | 6.0147919703  |
| C83  | -6.8949467777 | -1.4581229395 | 4.2313949793  |
| C85  | -6.8300570157 | -1.5173902556 | 2.8352998084  |
| H86  | -7.7305330659 | -1.7453046585 | 2.2685139578  |
| C87  | -5.6384260721 | -1.2928999391 | 2.1507471922  |
| H88  | -5.6029597484 | -1.3516237355 | 1.0667500094  |
| Ta89 | -1.2911648475 | 0.9060375040  | -1.5776917436 |
| Ta90 | -0.1946624062 | -1.9867967395 | -0.9777478551 |
| Ta91 | 1.8006018899  | 0.4403472166  | -1.2264390966 |
| N92  | 0.2011589879  | -0.3989993187 | -2.4775766130 |
| N93  | -2.1778538078 | -0.9198198000 | -0.8981969288 |
| N94  | -2.3002499997 | 1.6769515646  | -2.8395050872 |
| N95  | -0.4289794848 | -3.5628436745 | -1.7898415324 |
| N96  | -0.5332727277 | -2.1749552646 | 1.1753355401  |
| N97  | 1.8530160603  | -1.6610950601 | -0.4433484561 |
| N98  | 3.2770435890  | 0.7727683729  | -2.1804835401 |
| C99  | 0.3424310167  | -0.7855539058 | -3.8465433840 |
| C100 | -0.7251525235 | -0.6850344440 | -4.7531456263 |
| H101 | -1.6774952876 | -0.2919746478 | -4.4132386797 |
| C102 | -0.5788387179 | -1.0871111795 | -6.0786034531 |
| H103 | -1.4287769112 | -0.9919975737 | -6.7519114027 |
| C104 | 0.6275812443  | -1.6130121014 | -6.5591595101 |
| C106 | 1.6841085361  | -1.7235334522 | -5.6499248330 |
| H107 | 2.6350340514  | -2.1366905029 | -5.9796717799 |
| C108 | 1.5498306060  | -1.3223269160 | -4.3217914564 |
| H109 | 2.3916169735  | -1.4330902904 | -3.6446786583 |
| C110 | -3.3886462686 | -1.5664674697 | -1.3051399205 |
| C111 | -4.3268774827 | -0.9421077476 | -2.1430934624 |
| H112 | -4.1329924629 | 0.0599224912  | -2.5090142334 |
| C113 | -5.4986886401 | -1.5979774183 | -2.5150054243 |
| H114 | -6.2024931623 | -1.0829474631 | -3.1663462895 |
| C115 | -5.7887414854 | -2.8957077482 | -2.0763129425 |
| C117 | -4.8505731755 | -3.5138286056 | -1.2432723310 |
| H118 | -5.0365167068 | -4.5224348311 | -0.8806015959 |
| C119 | -3.6772660501 | -2.8677379041 | -0.8613451359 |
| H120 | -2.9761878901 | -3.3808942896 | -0.2099760758 |
| C121 | -3.0631748424 | 2.3096681518  | -3.8006435829 |
| C122 | -4.3251305462 | 2.8469398738  | -3.4796256770 |
| H123 | -4.6823034693 | 2.7764538159  | -2.4558381350 |
| C124 | -5.0949324438 | 3.4651050016  | -4.4586755088 |
| H125 | -6.0669180484 | 3.8734704296  | -4.1876985146 |
| C126 | -4.6485127429 | 3.5748610291  | -5.7834319084 |
| C128 | -3.3909165262 | 3.0450529941  | -6.0915039851 |



|      |               |               |               |
|------|---------------|---------------|---------------|
| H129 | -3.0152246385 | 3.1198216538  | -7.1099338566 |
| C130 | -2.6049133392 | 2.4237708887  | -5.1246461592 |
| H131 | -1.6303959039 | 2.0201672554  | -5.3813229840 |
| C132 | -0.6803204986 | -4.7463281449 | -2.4533142545 |
| C133 | -0.7851879233 | -5.9606798097 | -1.7480731721 |
| H134 | -0.6653354339 | -5.9538072128 | -0.6678601288 |
| C135 | -1.0447687800 | -7.1463170957 | -2.4271574545 |
| H136 | -1.1248537440 | -8.0732049429 | -1.8617478102 |
| C137 | -1.2085279609 | -7.1728528364 | -3.8192369329 |
| C139 | -1.1000130034 | -5.9611094505 | -4.5110397892 |
| H140 | -1.2239026956 | -5.9517820150 | -5.5920631659 |
| C141 | -0.8409315469 | -4.7636676538 | -3.8497377141 |
| H142 | -0.7636834421 | -3.8304595620 | -4.4004203294 |
| C143 | -0.6849611069 | -3.4468885786 | 1.8175585912  |
| C144 | -1.8744999116 | -3.8281968863 | 2.4585646823  |
| H145 | -2.7149549406 | -3.1432402812 | 2.4763790989  |
| C146 | -1.9786946615 | -5.0671377700 | 3.0867943554  |
| H147 | -2.9143781077 | -5.3271516470 | 3.5782416184  |
| C148 | -0.9136881963 | -5.9763289754 | 3.1081210125  |
| C150 | 0.2670831836  | -5.5943932632 | 2.4633341299  |
| H151 | 1.1195797530  | -6.2702761865 | 2.4583662510  |
| C152 | 0.3824716970  | -4.3600259482 | 1.8274836328  |
| H153 | 1.3169087536  | -4.0996254539 | 1.3388287338  |
| C154 | 2.9960720242  | -2.4961712174 | -0.6538720663 |
| C155 | 2.8834638256  | -3.8181021374 | -1.1156470526 |
| H156 | 1.9015159795  | -4.2283637661 | -1.3249526822 |
| C157 | 4.0180044314  | -4.5979718975 | -1.3274792986 |
| H158 | 3.8923770438  | -5.6163175990 | -1.6906191243 |
| C159 | 5.3077168825  | -4.1041890963 | -1.0946677588 |
| C161 | 5.4153249558  | -2.7896281328 | -0.6302729628 |
| H162 | 6.3992085839  | -2.3654508190 | -0.4409053604 |
| C163 | 4.2880096393  | -2.0014172238 | -0.4079279315 |
| H164 | 4.4123257825  | -0.9843536128 | -0.0481292008 |
| C165 | 4.4590461642  | 0.9963312059  | -2.8565684671 |
| C166 | 4.5142339215  | 0.9385086131  | -4.2624224027 |
| H167 | 3.6078986945  | 0.7083885318  | -4.8147810296 |
| C168 | 5.7134569697  | 1.1654852465  | -4.9276512883 |
| H169 | 5.7332314981  | 1.1145304369  | -6.0147919703 |
| C170 | 6.8949467777  | 1.4581229395  | -4.2313949793 |
| C172 | 6.8300570157  | 1.5173902556  | -2.8352998084 |
| H173 | 7.7305330659  | 1.7453046585  | -2.2685139578 |
| C174 | 5.6384260721  | 1.2928999391  | -2.1507471922 |
| H175 | 5.6029597484  | 1.3516237355  | -1.0667500094 |
| C176 | -5.5015980045 | 4.2453292131  | -6.8357063568 |
| H177 | -5.0045661941 | 4.2474486727  | -7.8112742511 |
| H178 | -6.4666545816 | 3.7362231811  | -6.9555025118 |
| H179 | -5.7207763898 | 5.2879753600  | -6.5719373836 |
| C179 | 5.5015980045  | -4.2453292131 | 6.8357063568  |
| H180 | 5.0045661941  | -4.2474486727 | 7.8112742511  |
| H181 | 5.7207763898  | -5.2879753600 | 6.5719373836  |
| H182 | 6.4666545816  | -3.7362231811 | 6.9555025118  |

|      |               |               |               |
|------|---------------|---------------|---------------|
| C182 | 1.4959294264  | 8.4696285393  | 4.5409598215  |
| H183 | 1.5970775267  | 8.3123358769  | 5.6198007434  |
| H184 | 2.4257038817  | 8.9311842890  | 4.1839530500  |
| H185 | 0.6947402753  | 9.2037488369  | 4.3857320531  |
| C185 | -1.4959294264 | -8.4696285393 | -4.5409598215 |
| H186 | -1.5970775267 | -8.3123358769 | -5.6198007434 |
| H187 | -0.6947402753 | -9.2037488369 | -4.3857320531 |
| H188 | -2.4257038817 | -8.9311842890 | -4.1839530500 |
| C188 | 8.1899046111  | 1.6999672803  | -4.9724162812 |
| H189 | 9.0108258552  | 1.9195816647  | -4.2820859703 |
| H190 | 8.4815741546  | 0.8251809860  | -5.5678680478 |
| H191 | 8.1044327181  | 2.5451648523  | -5.6674411227 |
| C191 | -8.1899046111 | -1.6999672803 | 4.9724162812  |
| H192 | -9.0108258552 | -1.9195816647 | 4.2820859703  |
| H193 | -8.1044327181 | -2.5451648523 | 5.6674411227  |
| H194 | -8.4815741546 | -0.8251809860 | 5.5678680478  |
| C194 | -0.7713025129 | 2.0475853472  | 7.9996106520  |
| H195 | -1.7727699537 | 2.4423636307  | 8.1991838199  |
| H196 | -0.5990796501 | 1.2127456598  | 8.6910300504  |
| H197 | -0.0473606009 | 2.8309905165  | 8.2577835273  |
| C197 | 0.7713025129  | -2.0475853472 | -7.9996106520 |
| H198 | 1.7727699537  | -2.4423636307 | -8.1991838199 |
| H199 | 0.0473606009  | -2.8309905165 | -8.2577835273 |
| H200 | 0.5990796501  | -1.2127456598 | -8.6910300504 |
| C200 | -6.5285956453 | 4.9604191240  | 1.3401703038  |
| H201 | -7.4503585970 | 4.4152369478  | 1.1124187752  |
| H202 | -6.5856382713 | 5.2874731518  | 2.3861349206  |
| H203 | -6.5159235589 | 5.8668083283  | 0.7214065633  |
| C203 | 6.5285956453  | -4.9604191240 | -1.3401703038 |
| H204 | 7.4503585970  | -4.4152369478 | -1.1124187752 |
| H205 | 6.5159235589  | -5.8668083283 | -0.7214065633 |
| H206 | 6.5856382713  | -5.2874731518 | -2.3861349206 |
| C206 | 7.0631985444  | 3.5959764205  | 2.4882629828  |
| H207 | 7.1295861584  | 4.5944841329  | 2.0440892703  |
| H208 | 7.1237929614  | 3.7125709534  | 3.5777655581  |
| H209 | 7.9520741669  | 3.0327914833  | 2.1762325576  |
| C209 | -1.0379754058 | -7.3108888447 | 3.8061984799  |
| H210 | -0.1156260964 | -7.8941201379 | 3.7181354771  |
| H211 | -1.2504362603 | -7.1858040795 | 4.8756001541  |
| H212 | -1.8543698952 | -7.9118204756 | 3.3856529233  |
| C212 | -7.0631985444 | -3.5959764205 | -2.4882629828 |
| H213 | -7.1295861584 | -4.5944841329 | -2.0440892703 |
| H214 | -7.9520741669 | -3.0327914833 | -2.1762325576 |
| H215 | -7.1237929614 | -3.7125709534 | -3.5777655581 |
| C215 | 1.0379754058  | 7.3108888447  | -3.8061984799 |
| H216 | 0.1156260964  | 7.8941201379  | -3.7181354771 |
| H217 | 1.8543698952  | 7.9118204756  | -3.3856529233 |
| H218 | 1.2504362603  | 7.1858040795  | -4.8756001541 |

**Table S4.** Calculated coordinates for  $C_i$ -optimized **4**.

|     |               |               |               |
|-----|---------------|---------------|---------------|
| Ta1 | -0.0310201169 | -2.2135575039 | -0.2663058695 |
| Ta2 | 0.9670547207  | 0.2294047805  | -1.9873534119 |
| Ta3 | 1.9949174152  | -0.1471941447 | 0.9666879508  |
| N4  | 1.9185981053  | -1.4027886316 | -0.8248383617 |
| N5  | -0.7066669223 | -1.2703159575 | -2.0656468044 |
| N6  | -0.0690089018 | -3.9994856974 | -0.4142555644 |
| N7  | 1.6899554931  | 0.3188865310  | -3.6227105600 |
| N8  | -0.6878318399 | 1.6416965318  | -1.7927498521 |
| N9  | 1.9633520882  | 1.4857006301  | -0.5639314384 |
| N10 | 3.6085774166  | -0.2210067354 | 1.7425857746  |
| O11 | 0.0000000000  | 0.0000000000  | 0.0000000000  |
| C12 | 3.0652157415  | -2.0376422353 | -1.3975894774 |
| C13 | 2.9663823852  | -3.2755263779 | -2.0576381299 |
| H14 | 2.0019546233  | -3.7691190704 | -2.1176360329 |
| C15 | 4.0783226181  | -3.8738221160 | -2.6377776170 |
| H16 | 3.9935120642  | -4.8308856820 | -3.1441614856 |
| C17 | 5.3310039985  | -3.2491209091 | -2.5868536006 |
| C19 | 5.4474216802  | -2.0129529215 | -1.9454338233 |
| H20 | 6.3974131545  | -1.4928073596 | -1.8941234254 |
| C21 | 4.3248295006  | -1.4222362944 | -1.3629367151 |
| H22 | 4.4371310306  | -0.4564309451 | -0.8799274226 |
| C23 | -1.1527839344 | -1.8219545575 | -3.3070730385 |
| C24 | -1.3888915105 | -3.1972474051 | -3.4830803929 |
| H25 | -1.2098643322 | -3.8798933579 | -2.6589439670 |
| C26 | -1.8453528328 | -3.6956942748 | -4.6985304174 |
| H27 | -2.0264353074 | -4.7585824790 | -4.8291267969 |
| C28 | -2.0768924847 | -2.8386978554 | -5.7811928733 |
| C30 | -1.8403520267 | -1.4696198979 | -5.6274402823 |
| H31 | -2.0031463146 | -0.7741806152 | -6.4430914272 |
| C32 | -1.3868733135 | -0.9785972977 | -4.4043456312 |
| H33 | -1.2157105344 | 0.0888456170  | -4.3046177030 |
| C34 | -0.0925319726 | -5.3803404174 | -0.4586471368 |
| C35 | -1.3137741183 | -6.0860871096 | -0.4856273041 |
| H36 | -2.2456968854 | -5.5283170321 | -0.4538065978 |
| C37 | -1.3279496862 | -7.4718571005 | -0.5397114962 |
| H38 | -2.2642514165 | -8.0216894752 | -0.5587161165 |
| C39 | -0.1282612159 | -8.1960541987 | -0.5695657998 |
| C40 | 1.0906260589  | -7.5111145191 | -0.5373765006 |
| H41 | 2.0338582862  | -8.0456147012 | -0.5540535087 |
| C42 | 1.1021753228  | -6.1183550650 | -0.4803442151 |
| H43 | 2.0479080080  | -5.5863949959 | -0.4498896829 |
| C44 | 2.1939407148  | 0.2340820742  | -4.9041651202 |
| C45 | 1.9336751207  | 1.2329558022  | -5.8646562135 |
| H46 | 1.3304259202  | 2.0917411496  | -5.5825032642 |
| C47 | 2.4250159456  | 1.1145163159  | -7.1569352520 |
| H48 | 2.2246508651  | 1.8764687577  | -7.9044024196 |
| C49 | 3.1857433730  | -0.0022118766 | -7.5293791412 |
| C51 | 3.4597923581  | -0.9969144480 | -6.5849782433 |
| H52 | 4.0454279693  | -1.8716372708 | -6.8454439408 |

|      |               |               |               |
|------|---------------|---------------|---------------|
| C53  | 2.9671397581  | -0.8744278643 | -5.2878303745 |
| H54  | 3.1661854478  | -1.6523814924 | -4.5564832938 |
| C55  | -0.9304083343 | 2.6638163728  | -2.7652349283 |
| C56  | -2.1222969601 | 2.7351672851  | -3.5082116044 |
| H57  | -2.8957495376 | 1.9910783264  | -3.3499367613 |
| C58  | -2.3331507894 | 3.7579327956  | -4.4254293449 |
| H59  | -3.2586876712 | 3.8135897554  | -4.9908548760 |
| C60  | -1.3630998834 | 4.7462378683  | -4.6312852902 |
| C62  | -0.1677506729 | 4.6867961313  | -3.9086177280 |
| H63  | 0.6075684415  | 5.4335210588  | -4.0380673530 |
| C64  | 0.0369936661  | 3.6541530788  | -2.9942467825 |
| H65  | 0.9711297497  | 3.6284033399  | -2.4411898493 |
| C66  | 3.0964961566  | 2.3411112805  | -0.7220735905 |
| C67  | 3.6515489269  | 2.6218369203  | -1.9842779016 |
| H68  | 3.2106150183  | 2.1785093696  | -2.8713470771 |
| C69  | 4.7715331518  | 3.4341368323  | -2.1112068460 |
| H70  | 5.1991214520  | 3.6409418914  | -3.0878976494 |
| C71  | 5.3803289597  | 3.9941920822  | -0.9818056794 |
| C73  | 4.8390543708  | 3.7344973594  | 0.2808753589  |
| H74  | 5.2838174348  | 4.1462062999  | 1.1800387322  |
| C75  | 3.7099294810  | 2.9232238474  | 0.3978131600  |
| H76  | 3.3071513267  | 2.7314176963  | 1.3875990420  |
| C77  | 4.8568155589  | -0.1774425727 | 2.3302298425  |
| C78  | 5.8806253717  | -1.0698954393 | 1.9488755388  |
| H79  | 5.6769225749  | -1.8051572661 | 1.1762056649  |
| C80  | 7.1334393615  | -1.0021800512 | 2.5390606575  |
| H81  | 7.9271290569  | -1.6841872659 | 2.2486388268  |
| C82  | 7.4042470958  | -0.0453340210 | 3.5269781637  |
| C84  | 6.3971699098  | 0.8400814187  | 3.9234935121  |
| H85  | 6.5775391954  | 1.5860837664  | 4.6896770590  |
| C86  | 5.1383962081  | 0.7699371548  | 3.3284898346  |
| H87  | 4.3545395745  | 1.4549003403  | 3.6377165308  |
| Ta88 | 0.0310201169  | 2.2135575039  | 0.2663058695  |
| Ta89 | -0.9670547207 | -0.2294047805 | 1.9873534119  |
| Ta90 | -1.9949174152 | 0.1471941447  | -0.9666879508 |
| N91  | -1.9185981053 | 1.4027886316  | 0.8248383617  |
| N92  | 0.7066669223  | 1.2703159575  | 2.0656468044  |
| N93  | 0.0690089018  | 3.9994856974  | 0.4142555644  |
| N94  | -1.6899554931 | -0.3188865310 | 3.6227105600  |
| N95  | 0.6878318399  | -1.6416965318 | 1.7927498521  |
| N96  | -1.9633520882 | -1.4857006301 | 0.5639314384  |
| N97  | -3.6085774166 | 0.2210067354  | -1.7425857746 |
| C98  | -3.0652157415 | 2.0376422353  | 1.3975894774  |
| C99  | -2.9663823852 | 3.2755263779  | 2.0576381299  |
| H100 | -2.0019546233 | 3.7691190704  | 2.1176360329  |
| C101 | -4.0783226181 | 3.8738221160  | 2.6377776170  |
| H102 | -3.9935120642 | 4.8308856820  | 3.1441614856  |
| C103 | -5.3310039985 | 3.2491209091  | 2.5868536006  |
| C105 | -5.4474216802 | 2.0129529215  | 1.9454338233  |
| H106 | -6.3974131545 | 1.4928073596  | 1.8941234254  |
| C107 | -4.3248295006 | 1.4222362944  | 1.3629367151  |

|      |               |               |               |
|------|---------------|---------------|---------------|
| H108 | -4.4371310306 | 0.4564309451  | 0.8799274226  |
| C109 | 1.1527839344  | 1.8219545575  | 3.3070730385  |
| C110 | 1.3888915105  | 3.1972474051  | 3.4830803929  |
| H111 | 1.2098643322  | 3.8798933579  | 2.6589439670  |
| C112 | 1.8453528328  | 3.6956942748  | 4.6985304174  |
| H113 | 2.0264353074  | 4.7585824790  | 4.8291267969  |
| C114 | 2.0768924847  | 2.8386978554  | 5.7811928733  |
| C116 | 1.8403520267  | 1.4696198979  | 5.6274402823  |
| H117 | 2.0031463146  | 0.7741806152  | 6.4430914272  |
| C118 | 1.3868733135  | 0.9785972977  | 4.4043456312  |
| H119 | 1.2157105344  | -0.0888456170 | 4.3046177030  |
| C120 | 0.0925319726  | 5.3803404174  | 0.4586471368  |
| C121 | 1.3137741183  | 6.0860871096  | 0.4856273041  |
| H122 | 2.2456968854  | 5.5283170321  | 0.4538065978  |
| C123 | 1.3279496862  | 7.4718571005  | 0.5397114962  |
| H124 | 2.2642514165  | 8.0216894752  | 0.5587161165  |
| C125 | 0.1282612159  | 8.1960541987  | 0.5695657998  |
| C126 | -1.0906260589 | 7.5111145191  | 0.5373765006  |
| H127 | -2.0338582862 | 8.0456147012  | 0.5540535087  |
| C128 | -1.1021753228 | 6.1183550650  | 0.4803442151  |
| H129 | -2.0479080080 | 5.5863949959  | 0.4498896829  |
| C130 | -2.1939407148 | -0.2340820742 | 4.9041651202  |
| C131 | -1.9336751207 | -1.2329558022 | 5.8646562135  |
| H132 | -1.3304259202 | -2.0917411496 | 5.5825032642  |
| C133 | -2.4250159456 | -1.1145163159 | 7.1569352520  |
| H134 | -2.2246508651 | -1.8764687577 | 7.9044024196  |
| C135 | -3.1857433730 | 0.0022118766  | 7.5293791412  |
| C137 | -3.4597923581 | 0.9969144480  | 6.5849782433  |
| H138 | -4.0454279693 | 1.8716372708  | 6.8454439408  |
| C139 | -2.9671397581 | 0.8744278643  | 5.2878303745  |
| H140 | -3.1661854478 | 1.6523814924  | 4.5564832938  |
| C141 | 0.9304083343  | -2.6638163728 | 2.7652349283  |
| C142 | 2.1222969601  | -2.7351672851 | 3.5082116044  |
| H143 | 2.8957495376  | -1.9910783264 | 3.3499367613  |
| C144 | 2.3331507894  | -3.7579327956 | 4.4254293449  |
| H145 | 3.2586876712  | -3.8135897554 | 4.9908548760  |
| C146 | 1.3630998834  | -4.7462378683 | 4.6312852902  |
| C148 | 0.1677506729  | -4.6867961313 | 3.9086177280  |
| H149 | -0.6075684415 | -5.4335210588 | 4.0380673530  |
| C150 | -0.0369936661 | -3.6541530788 | 2.9942467825  |
| H151 | -0.9711297497 | -3.6284033399 | 2.4411898493  |
| C152 | -3.0964961566 | -2.3411112805 | 0.7220735905  |
| C153 | -3.6515489269 | -2.6218369203 | 1.9842779016  |
| H154 | -3.2106150183 | -2.1785093696 | 2.8713470771  |
| C155 | -4.7715331518 | -3.4341368323 | 2.1112068460  |
| H156 | -5.1991214520 | -3.6409418914 | 3.0878976494  |
| C157 | -5.3803289597 | -3.9941920822 | 0.9818056794  |
| C159 | -4.8390543708 | -3.7344973594 | -0.2808753589 |
| H160 | -5.2838174348 | -4.1462062999 | -1.1800387322 |
| C161 | -3.7099294810 | -2.9232238474 | -0.3978131600 |
| H162 | -3.3071513267 | -2.7314176963 | -1.3875990420 |

|      |                |                |               |
|------|----------------|----------------|---------------|
| C163 | -4.8568155589  | 0.1774425727   | -2.3302298425 |
| C164 | -5.8806253717  | 1.0698954393   | -1.9488755388 |
| H165 | -5.6769225749  | 1.8051572661   | -1.1762056649 |
| C166 | -7.1334393615  | 1.0021800512   | -2.5390606575 |
| H167 | -7.9271290569  | 1.6841872659   | -2.2486388268 |
| C168 | -7.4042470958  | 0.0453340210   | -3.5269781637 |
| C170 | -6.3971699098  | -0.8400814187  | -3.9234935121 |
| H171 | -6.5775391954  | -1.5860837664  | -4.6896770590 |
| C172 | -5.1383962081  | -0.7699371548  | -3.3284898346 |
| H173 | -4.3545395745  | -1.4549003403  | -3.6377165308 |
| O175 | 0.2584517277   | 9.5551139724   | 0.6269031380  |
| O176 | -0.2584517277  | -9.5551139724  | -0.6269031380 |
| C177 | -0.9206702479  | 10.3373855206  | 0.6675557193  |
| H178 | -0.5909840292  | 11.3774219831  | 0.7124993446  |
| H179 | -1.5360859034  | 10.1915875459  | -0.2306352662 |
| H180 | -1.5268867064  | 10.1112724633  | 1.5552731570  |
| C181 | 0.9206702479   | -10.3373855206 | -0.6675557193 |
| H182 | 0.5909840292   | -11.3774219831 | -0.7124993446 |
| H183 | 1.5268867064   | -10.1112724633 | -1.5552731570 |
| H184 | 1.5360859034   | -10.1915875459 | 0.2306352662  |
| O186 | 3.6056493882   | -0.0274028284  | -8.8304342520 |
| O187 | -3.6056493882  | 0.0274028284   | 8.8304342520  |
| O188 | 8.6737188417   | -0.0618995516  | 4.0337351866  |
| O189 | -8.6737188417  | 0.0618995516   | -4.0337351866 |
| O190 | 6.4827161258   | 4.7655623602   | -1.2171288806 |
| O191 | 2.5318481469   | 3.4269548795   | 6.9274112472  |
| O192 | -6.3578767948  | 3.9173705031   | 3.1918777893  |
| O193 | -1.6751329272  | 5.7121917346   | -5.5451655131 |
| O194 | 1.6751329272   | -5.7121917346  | 5.5451655131  |
| O195 | -2.5318481469  | -3.4269548795  | -6.9274112472 |
| O196 | -6.4827161258  | -4.7655623602  | 1.2171288806  |
| O197 | 6.3578767948   | -3.9173705031  | -3.1918777893 |
| C198 | 9.0095663792   | 0.8890334827   | 5.0261248140  |
| H199 | 10.0549012337  | 0.7025057275   | 5.2812532131  |
| H200 | 8.9059434377   | 1.9175859272   | 4.6538666754  |
| H201 | 8.3916250761   | 0.7725269695   | 5.9268367979  |
| C201 | -9.0095663792  | -0.8890334827  | -5.0261248140 |
| H202 | -10.0549012337 | -0.7025057275  | -5.2812532131 |
| H203 | -8.3916250761  | -0.7725269695  | -5.9268367979 |
| H204 | -8.9059434377  | -1.9175859272  | -4.6538666754 |
| C204 | -7.6389432867  | 3.3144798071   | 3.1854851332  |
| H205 | -8.2995259288  | 4.0046573842   | 3.7145533086  |
| H206 | -8.0136254937  | 3.1673792256   | 2.1634602496  |
| H207 | -7.6338815022  | 2.3468989308   | 3.7056983515  |
| C207 | 2.7879965910   | 2.5949753825   | 8.0442472370  |
| H208 | 3.1371015400   | 3.2569565636   | 8.8395969908  |
| H209 | 1.8813947380   | 2.0734579282   | 8.3793068036  |
| H210 | 3.5659772193   | 1.8504512811   | 7.8251072310  |
| C210 | 7.1453297022   | 5.3379593197   | -0.1051763550 |
| H211 | 7.9867671579   | 5.9018064177   | -0.5134291485 |
| H212 | 6.4890277889   | 6.0209551304   | 0.4514246422  |

|      |               |               |                |
|------|---------------|---------------|----------------|
| H213 | 7.5236488836  | 4.5682336830  | 0.5812711651   |
| C213 | -0.7301818674 | 6.7414168337  | -5.7741278107  |
| H214 | -1.1753663485 | 7.3976642117  | -6.5249184018  |
| H215 | -0.5297169544 | 7.3183191421  | -4.8611314016  |
| H216 | 0.2184966733  | 6.3432560717  | -6.1594080436  |
| C216 | -4.3517264012 | 1.1474604757  | 9.2682852164   |
| H217 | -4.5752196043 | 0.9680589638  | 10.3221408289  |
| H218 | -3.7774427460 | 2.0793631894  | 9.1733837498   |
| H219 | -5.2934383706 | 1.2522735528  | 8.7125304848   |
| C219 | 4.3517264012  | -1.1474604757 | -9.2682852164  |
| H220 | 4.5752196043  | -0.9680589638 | -10.3221408289 |
| H221 | 5.2934383706  | -1.2522735528 | -8.7125304848  |
| H222 | 3.7774427460  | -2.0793631894 | -9.1733837498  |
| C222 | -2.7879965910 | -2.5949753825 | -8.0442472370  |
| H223 | -3.1371015400 | -3.2569565636 | -8.8395969908  |
| H224 | -3.5659772193 | -1.8504512811 | -7.8251072310  |
| H225 | -1.8813947380 | -2.0734579282 | -8.3793068036  |
| C225 | 0.7301818674  | -6.7414168337 | 5.7741278107   |
| H226 | 1.1753663485  | -7.3976642117 | 6.5249184018   |
| H227 | -0.2184966733 | -6.3432560717 | 6.1594080436   |
| H228 | 0.5297169544  | -7.3183191421 | 4.8611314016   |
| C228 | -7.1453297022 | -5.3379593197 | 0.1051763550   |
| H229 | -7.9867671579 | -5.9018064177 | 0.5134291485   |
| H230 | -7.5236488836 | -4.5682336830 | -0.5812711651  |
| H231 | -6.4890277889 | -6.0209551304 | -0.4514246422  |
| C231 | 7.6389432867  | -3.3144798071 | -3.1854851332  |
| H232 | 8.2995259288  | -4.0046573842 | -3.7145533086  |
| H233 | 7.6338815022  | -2.3468989308 | -3.7056983515  |
| H234 | 8.0136254937  | -3.1673792256 | -2.1634602496  |

**Table S5.** Calculated coordinates for  $C_i$ -optimized **9**.

|     |               |               |               |
|-----|---------------|---------------|---------------|
| Ta1 | 1.2882211810  | -0.9075001947 | 1.5763630727  |
| Ta2 | 0.1984084797  | 1.9882340609  | 0.9814400156  |
| Ta3 | -1.8073976992 | -0.4306944224 | 1.2281612329  |
| N4  | -0.1939555675 | 0.4078395027  | 2.4824362570  |
| N5  | 2.1654450741  | 0.9554526937  | 0.8829072430  |
| N6  | 2.2914322480  | -1.6918403091 | 2.8305734755  |
| N7  | 0.4219645645  | 3.5664660176  | 1.7868233748  |
| N8  | 0.4903632910  | 2.1739408468  | -1.1838290102 |
| N9  | -1.8777272505 | 1.6308505219  | 0.4445395926  |
| N10 | -3.2928120949 | -0.7443951709 | 2.1711652948  |
| O11 | 0.0000000000  | 0.0000000000  | 0.0000000000  |
| C12 | -0.3015870995 | 0.7854559896  | 3.8546849818  |
| C13 | 0.7854378329  | 0.7060555517  | 4.7361004917  |
| H14 | 1.7476588765  | 0.3361185875  | 4.3999906969  |
| C15 | 0.6177129084  | 1.1124503698  | 6.0590523965  |
| H16 | 1.4570912321  | 1.0499508453  | 6.7496950498  |
| N17 | -0.5257187806 | 1.5898132451  | 6.5635420370  |
| C18 | -1.5576154842 | 1.6709007668  | 5.7151119222  |
| H19 | -2.4859188956 | 2.0655566822  | 6.1247869876  |

|     |               |               |               |
|-----|---------------|---------------|---------------|
| C20 | -1.5030583206 | 1.2909804832  | 4.3757034217  |
| H21 | -2.3822965176 | 1.3918086412  | 3.7473981059  |
| C22 | 3.3784557938  | 1.5868353923  | 1.2980240258  |
| C23 | 4.2957566268  | 0.9612348343  | 2.1534589413  |
| H24 | 4.1013202165  | -0.0286133245 | 2.5490831499  |
| C25 | 5.4689563045  | 1.6326627165  | 2.4969657226  |
| H26 | 6.1871768388  | 1.1519188683  | 3.1594080522  |
| N27 | 5.7947682408  | 2.8548911463  | 2.0649802577  |
| C28 | 4.9102281170  | 3.4512851780  | 1.2559660030  |
| H29 | 5.1734835885  | 4.4493216137  | 0.9103468465  |
| C30 | 3.7107059294  | 2.8745518361  | 0.8461208088  |
| H31 | 3.0468479967  | 3.4215786927  | 0.1839814035  |
| C32 | 3.0392159625  | -2.3534409133 | 3.7828318416  |
| C33 | 4.3169132837  | -2.8537744465 | 3.4809867556  |
| H34 | 4.7300950402  | -2.7377916797 | 2.4839937170  |
| C35 | 5.0274250250  | -3.5105116407 | 4.4823510033  |
| H36 | 6.0183768499  | -3.9079890915 | 4.2693210135  |
| N37 | 4.5734384820  | -3.7001588734 | 5.7269846464  |
| C38 | 3.3527624358  | -3.2234162410 | 6.0015912374  |
| H39 | 2.9925698976  | -3.3887849622 | 7.0155599466  |
| C40 | 2.5493671003  | -2.5514230680 | 5.0846093593  |
| H41 | 1.5659153621  | -2.1863443472 | 5.3619036608  |
| C42 | 0.6439260462  | 4.7724714963  | 2.4196200238  |
| C43 | 0.7250716728  | 5.9690531404  | 1.6883177850  |
| H44 | 0.6159094194  | 5.9612369821  | 0.6082717555  |
| C45 | 0.9501728906  | 7.1556096522  | 2.3813886034  |
| H46 | 1.0190026118  | 8.0950897981  | 1.8354171055  |
| N47 | 1.0939371508  | 7.2360410767  | 3.7095728406  |
| C48 | 1.0137625676  | 6.0883862129  | 4.3951326705  |
| H49 | 1.1328218994  | 6.1673642693  | 5.4743648541  |
| C50 | 0.7931249231  | 4.8427181479  | 3.8146516492  |
| H51 | 0.7370514736  | 3.9431305991  | 4.4191999024  |
| C52 | 0.6567981332  | 3.4405083560  | -1.8258116035 |
| C53 | 1.8456186689  | 3.8081784781  | -2.4702076842 |
| H54 | 2.6867451846  | 3.1264700046  | -2.5158260793 |
| C55 | 1.9312999658  | 5.0651854868  | -3.0687174768 |
| H56 | 2.8523595212  | 5.3572714956  | -3.5705969890 |
| N57 | 0.9449668698  | 5.9674114794  | -3.0777164955 |
| C58 | -0.1889005110 | 5.6093830292  | -2.4626984148 |
| H59 | -0.9935517130 | 6.3426071384  | -2.4750891003 |
| C60 | -0.3832175306 | 4.3844796306  | -1.8291704693 |
| H61 | -1.3330034006 | 4.1691601920  | -1.3493584265 |
| C62 | -3.0155165956 | 2.4711414699  | 0.6449911988  |
| C63 | -2.9027931726 | 3.7892719950  | 1.1078208315  |
| H64 | -1.9335654254 | 4.2156940227  | 1.3392815471  |
| C65 | -4.0599344048 | 4.5485795678  | 1.2826281878  |
| H66 | -3.9784085233 | 5.5726340271  | 1.6432446735  |
| N67 | -5.2983086906 | 4.1077940678  | 1.0395024853  |
| C68 | -5.4001063888 | 2.8481028395  | 0.5986472161  |
| H69 | -6.4093827158 | 2.4874166903  | 0.4068090172  |
| C70 | -4.3143092234 | 2.0033127711  | 0.3821987165  |



|      |               |               |               |
|------|---------------|---------------|---------------|
| H71  | -4.4791632858 | 0.9934140521  | 0.0204741125  |
| C72  | -4.4690204915 | -0.9683479347 | 2.8567054920  |
| C73  | -4.5030799149 | -0.9717767014 | 4.2610826112  |
| H74  | -3.5976859943 | -0.7923042403 | 4.8317023260  |
| C75  | -5.7203268288 | -1.2042167297 | 4.8958177009  |
| H76  | -5.7698797448 | -1.2091679813 | 5.9834385808  |
| N77  | -6.8731950237 | -1.4305146523 | 4.2545166764  |
| C78  | -6.8278336067 | -1.4298208632 | 2.9164975884  |
| H79  | -7.7708222058 | -1.6189066470 | 2.4063252191  |
| C80  | -5.6725202591 | -1.2085440991 | 2.1720324171  |
| H81  | -5.6936168109 | -1.2296742195 | 1.0872442333  |
| Ta82 | -1.2882211810 | 0.9075001947  | -1.5763630727 |
| Ta83 | -0.1984084797 | -1.9882340609 | -0.9814400156 |
| Ta84 | 1.8073976992  | 0.4306944224  | -1.2281612329 |
| N85  | 0.1939555675  | -0.4078395027 | -2.4824362570 |
| N86  | -2.1654450741 | -0.9554526937 | -0.8829072430 |
| N87  | -2.2914322480 | 1.6918403091  | -2.8305734755 |
| N88  | -0.4219645645 | -3.5664660176 | -1.7868233748 |
| N89  | -0.4903632910 | -2.1739408468 | 1.1838290102  |
| N90  | 1.8777272505  | -1.6308505219 | -0.4445395926 |
| N91  | 3.2928120949  | 0.7443951709  | -2.1711652948 |
| C92  | 0.3015870995  | -0.7854559896 | -3.8546849818 |
| C93  | -0.7854378329 | -0.7060555517 | -4.7361004917 |
| H94  | -1.7476588765 | -0.3361185875 | -4.3999906969 |
| C95  | -0.6177129084 | -1.1124503698 | -6.0590523965 |
| H96  | -1.4570912321 | -1.0499508453 | -6.7496950498 |
| N97  | 0.5257187806  | -1.5898132451 | -6.5635420370 |
| C98  | 1.5576154842  | -1.6709007668 | -5.7151119222 |
| H99  | 2.4859188956  | -2.0655566822 | -6.1247869876 |
| C100 | 1.5030583206  | -1.2909804832 | -4.3757034217 |
| H101 | 2.3822965176  | -1.3918086412 | -3.7473981059 |
| C102 | -3.3784557938 | -1.5868353923 | -1.2980240258 |
| C103 | -4.2957566268 | -0.9612348343 | -2.1534589413 |
| H104 | -4.1013202165 | 0.0286133245  | -2.5490831499 |
| C105 | -5.4689563045 | -1.6326627165 | -2.4969657226 |
| H106 | -6.1871768388 | -1.1519188683 | -3.1594080522 |
| N107 | -5.7947682408 | -2.8548911463 | -2.0649802577 |
| C108 | -4.9102281170 | -3.4512851780 | -1.2559660030 |
| H109 | -5.1734835885 | -4.4493216137 | -0.9103468465 |
| C110 | -3.7107059294 | -2.8745518361 | -0.8461208088 |
| H111 | -3.0468479967 | -3.4215786927 | -0.1839814035 |
| C112 | -3.0392159625 | 2.3534409133  | -3.7828318416 |
| C113 | -4.3169132837 | 2.8537744465  | -3.4809867556 |
| H114 | -4.7300950402 | 2.7377916797  | -2.4839937170 |
| C115 | -5.0274250250 | 3.5105116407  | -4.4823510033 |
| H116 | -6.0183768499 | 3.9079890915  | -4.2693210135 |
| N117 | -4.5734384820 | 3.7001588734  | -5.7269846464 |
| C118 | -3.3527624358 | 3.2234162410  | -6.0015912374 |
| H119 | -2.9925698976 | 3.3887849622  | -7.0155599466 |
| C120 | -2.5493671003 | 2.5514230680  | -5.0846093593 |
| H121 | -1.5659153621 | 2.1863443472  | -5.3619036608 |

|      |               |               |               |
|------|---------------|---------------|---------------|
| C122 | -0.6439260462 | -4.7724714963 | -2.4196200238 |
| C123 | -0.7250716728 | -5.9690531404 | -1.6883177850 |
| H124 | -0.6159094194 | -5.9612369821 | -0.6082717555 |
| C125 | -0.9501728906 | -7.1556096522 | -2.3813886034 |
| H126 | -1.0190026118 | -8.0950897981 | -1.8354171055 |
| N127 | -1.0939371508 | -7.2360410767 | -3.7095728406 |
| C128 | -1.0137625676 | -6.0883862129 | -4.3951326705 |
| H129 | -1.1328218994 | -6.1673642693 | -5.4743648541 |
| C130 | -0.7931249231 | -4.8427181479 | -3.8146516492 |
| H131 | -0.7370514736 | -3.9431305991 | -4.4191999024 |
| C132 | -0.6567981332 | -3.4405083560 | 1.8258116035  |
| C133 | -1.8456186689 | -3.8081784781 | 2.4702076842  |
| H134 | -2.6867451846 | -3.1264700046 | 2.5158260793  |
| C135 | -1.9312999658 | -5.0651854868 | 3.0687174768  |
| H136 | -2.8523595212 | -5.3572714956 | 3.5705969890  |
| N137 | -0.9449668698 | -5.9674114794 | 3.0777164955  |
| C138 | 0.1889005110  | -5.6093830292 | 2.4626984148  |
| H139 | 0.9935517130  | -6.3426071384 | 2.4750891003  |
| C140 | 0.3832175306  | -4.3844796306 | 1.8291704693  |
| H141 | 1.3330034006  | -4.1691601920 | 1.3493584265  |
| C142 | 3.0155165956  | -2.4711414699 | -0.6449911988 |
| C143 | 2.9027931726  | -3.7892719950 | -1.1078208315 |
| H144 | 1.9335654254  | -4.2156940227 | -1.3392815471 |
| C145 | 4.0599344048  | -4.5485795678 | -1.2826281878 |
| H146 | 3.9784085233  | -5.5726340271 | -1.6432446735 |
| N147 | 5.2983086906  | -4.1077940678 | -1.0395024853 |
| C148 | 5.4001063888  | -2.8481028395 | -0.5986472161 |
| H149 | 6.4093827158  | -2.4874166903 | -0.4068090172 |
| C150 | 4.3143092234  | -2.0033127711 | -0.3821987165 |
| H151 | 4.4791632858  | -0.9934140521 | -0.0204741125 |
| C152 | 4.4690204915  | 0.9683479347  | -2.8567054920 |
| C153 | 4.5030799149  | 0.9717767014  | -4.2610826112 |
| H154 | 3.5976859943  | 0.7923042403  | -4.8317023260 |
| C155 | 5.7203268288  | 1.2042167297  | -4.8958177009 |
| H156 | 5.7698797448  | 1.2091679813  | -5.9834385808 |
| N157 | 6.8731950237  | 1.4305146523  | -4.2545166764 |
| C158 | 6.8278336067  | 1.4298208632  | -2.9164975884 |
| H159 | 7.7708222058  | 1.6189066470  | -2.4063252191 |
| C160 | 5.6725202591  | 1.2085440991  | -2.1720324171 |
| H161 | 5.6936168109  | 1.2296742195  | -1.0872442333 |

**Table S6.** Calculated coordinates for neutral decamethylcobaltocene.

|     |               |               |               |
|-----|---------------|---------------|---------------|
| Co1 | 0.0004455893  | -1.5503681848 | -0.2915052919 |
| C2  | 2.5265748421  | -2.4800261974 | -2.2281060131 |
| C3  | 1.0993428086  | -2.0229141990 | -2.1311961387 |
| C4  | 0.6506560917  | -0.6576885216 | -2.1093677931 |
| C5  | -0.0840509228 | -4.3448190778 | -1.9995188407 |
| C6  | 1.5292912836  | 0.5529445722  | -2.2523203866 |
| C7  | -0.7934275759 | -0.6453617211 | -2.1298017053 |
| C8  | -1.6575101107 | 0.5791204287  | -2.2266868944 |

|     |               |               |               |
|-----|---------------|---------------|---------------|
| C9  | -1.2270976343 | -1.9871483693 | -2.0249470239 |
| C10 | -2.6459686340 | -2.4783118617 | -2.0141318910 |
| C11 | -0.0519617745 | -2.8430763222 | -2.0094220631 |
| C12 | 2.6427667030  | -0.6127356446 | 1.4387989402  |
| C13 | 1.2253013975  | -1.1094131625 | 1.4451387259  |
| C14 | 0.7978040881  | -2.4535724270 | 1.5468210869  |
| C15 | 0.0686241862  | 1.2425724731  | 1.4192808077  |
| C16 | 1.6688279676  | -3.6735450994 | 1.6402269578  |
| C17 | -0.6462267189 | -2.4486276238 | 1.5244755610  |
| C18 | -1.5185859669 | -3.6639322319 | 1.6651384020  |
| C19 | -1.1014967415 | -1.0855725917 | 1.5467272154  |
| C20 | -2.5309713794 | -0.6345146086 | 1.6376329433  |
| C21 | 0.0460183479  | -0.2593562354 | 1.4282832253  |
| H22 | 0.8472062031  | -4.7670737358 | -1.6083496672 |
| H23 | -0.2249154640 | -4.7482851102 | -3.0121120204 |
| H24 | -0.9052449384 | -4.7286432166 | -1.3847378633 |
| H25 | -2.7703225488 | -3.3383467263 | -1.3473338635 |
| H26 | -2.9677722570 | -2.7984642137 | -3.0149749450 |
| H27 | -3.3406573931 | -1.7002872733 | -1.6821810659 |
| H28 | -1.2101298309 | 1.4338333489  | -1.7073139004 |
| H29 | -2.6471204270 | 0.4121057611  | -1.7888108935 |
| H30 | -1.8126515867 | 0.8841332199  | -3.2715276328 |
| H31 | 2.5160759309  | 0.3931351814  | -1.8052514049 |
| H32 | 1.0871187025  | 1.4336128012  | -1.7744777728 |
| H33 | 1.6901974259  | 0.8060311587  | -3.3100498688 |
| H34 | 3.2078094510  | -1.7894715260 | -1.7190686536 |
| H35 | 2.8610685796  | -2.5493840778 | -3.2733269635 |
| H36 | 2.6673321776  | -3.4685272990 | -1.7784074102 |
| H37 | -1.0651765674 | -4.5443300333 | 1.1976049505  |
| H38 | -2.5015901317 | -3.5138657610 | 1.2063999924  |
| H39 | -1.6894775693 | -3.9114095763 | 2.7225752440  |
| H40 | 2.6603154040  | -3.4961781835 | 1.2107071632  |
| H41 | 1.2309212853  | -4.5270683541 | 1.1108279855  |
| H42 | 1.8189237571  | -3.9862498136 | 2.6835844239  |
| H43 | 3.3357857974  | -1.3752086644 | 1.0693143388  |
| H44 | 2.9750796575  | -0.3317972979 | 2.4483035695  |
| H45 | 2.7587908158  | 0.2735735400  | 0.8055715407  |
| H46 | 0.8795951016  | 1.6329388525  | 0.7949661581  |
| H47 | 0.2188305612  | 1.6460851491  | 2.4304403027  |
| H48 | -0.8702429040 | 1.6583958173  | 1.0397369739  |
| H49 | -2.6791772907 | 0.3380827330  | 1.1569051564  |
| H50 | -2.8600115320 | -0.5331185586 | 2.6819610940  |
| H51 | -3.2117403149 | -1.3444557847 | 1.1552166779  |

**Table S7.** Calculated coordinates for the decamethylcobaltocenium cation.

|     |               |               |               |
|-----|---------------|---------------|---------------|
| Co1 | 0.0014421351  | -1.5509343939 | -0.2918159244 |
| C2  | 2.5353852039  | -2.4477958098 | -2.1062280597 |
| C3  | 1.1103524089  | -1.9934118220 | -2.0087476733 |
| C4  | 0.6562120778  | -0.6306170157 | -2.0533595829 |
| C5  | -0.0339023382 | -4.3436646988 | -1.9354417440 |

|     |               |               |               |
|-----|---------------|---------------|---------------|
| C6  | 1.5263758862  | 0.5809253131  | -2.2031713838 |
| C7  | -0.7795833560 | -0.6399670829 | -2.0053144468 |
| C8  | -1.6734047654 | 0.5599689633  | -2.0979172015 |
| C9  | -1.2124914011 | -2.0082310270 | -1.9295748830 |
| C10 | -2.6344695673 | -2.4812231207 | -1.9286259144 |
| C11 | -0.0444061870 | -2.8446994730 | -1.9326386249 |
| C12 | 2.6464311422  | -0.6578650826 | 1.3564561003  |
| C13 | 1.2175729851  | -1.1104118472 | 1.3506478180  |
| C14 | 0.7648646589  | -2.4721074491 | 1.4242345574  |
| C15 | 0.0722083474  | 1.2410823279  | 1.3492764469  |
| C16 | 1.6380598192  | -3.6869092395 | 1.5189145163  |
| C17 | -0.6709045101 | -2.4607287528 | 1.4689004151  |
| C18 | -1.5569359928 | -3.6606765247 | 1.6181249610  |
| C19 | -1.1054496129 | -1.0923598433 | 1.4214886301  |
| C20 | -2.5235914187 | -0.6165637457 | 1.5120365175  |
| C21 | 0.0615743853  | -0.2577218791 | 1.3483770978  |
| H22 | 0.8622889543  | -4.7479192423 | -1.4568810410 |
| H23 | -0.0471976850 | -4.7169939041 | -2.9675255398 |
| H24 | -0.9091497872 | -4.7599708688 | -1.4294437697 |
| H25 | -2.7480492407 | -3.4317834753 | -1.4008666850 |
| H26 | -2.9787753117 | -2.6382030513 | -2.9589314965 |
| H27 | -3.3081890058 | -1.7524046340 | -1.4698056252 |
| H28 | -1.1908247982 | 1.4588179895  | -1.7052168300 |
| H29 | -2.6139005440 | 0.4136478406  | -1.5597101077 |
| H30 | -1.9271882369 | 0.7601533062  | -3.1472611901 |
| H31 | 2.5071478358  | 0.4398472934  | -1.7406578368 |
| H32 | 1.0671053690  | 1.4711272477  | -1.7650906262 |
| H33 | 1.6965706329  | 0.7927270948  | -3.2669024478 |
| H34 | 3.2259420074  | -1.7200544269 | -1.6717752188 |
| H35 | 2.8183154109  | -2.5757588296 | -3.1593356530 |
| H36 | 2.6935118656  | -3.4088621227 | -1.6094385414 |
| H37 | -1.1147482411 | -4.5544431534 | 1.1695528079  |
| H38 | -2.5400231268 | -3.5022332003 | 1.1666049623  |
| H39 | -1.7196414928 | -3.8780279535 | 2.6818523341  |
| H40 | 2.5963261391  | -3.5427429268 | 1.0125433968  |
| H41 | 1.1563026396  | -4.5712175071 | 1.0929135237  |
| H42 | 1.8570889028  | -3.9119077770 | 2.5708695073  |
| H43 | 3.3082407010  | -1.3909232059 | 0.8876969869  |
| H44 | 2.9934942470  | -0.5198082610 | 2.3887739186  |
| H45 | 2.7754345498  | 0.2979349892  | 0.8413051569  |
| H46 | 0.9527917464  | 1.6440995989  | 0.8419190150  |
| H47 | 0.0912866292  | 1.6156581956  | 2.3807499702  |
| H48 | -0.8184561934 | 1.6571519369  | 0.8704863540  |
| H49 | -2.6670609047 | 0.3423829933  | 1.0069252152  |
| H50 | -2.8060229704 | -0.4754140137 | 2.5631675187  |
| H51 | -3.2242975795 | -1.3377359117 | 1.0829272824  |
